# Supplementary material for: Genotype-by-environment interactions inferred from genetic effects on phenotypic variability in the UK Biobank
Source: PubMed Central journal article supplement — Sci Adv. 2019 Aug 14;5(8):eaaw3538. doi: 10.1126/sciadv.aaw3538 (PMC6693916; doi:10.1126/sciadv.aaw3538), 2019-08-14
Supplement: aaw3538_SM.pdf [file aaw3538_SM.pdf]

## Supplementary Materials for

### Genotype-by-environment interactions inferred from genetic effects on phenotypic variability in the UK Biobank

Huanwei Wang, Futao Zhang, Jian Zeng, Yang Wu, Kathryn E. Kemper, Angli Xue, Min Zhang, Joseph E. Powell, Michael E. Goddard, Naomi R. Wray, Peter M. Visscher, Allan F. McRae, Jian Yang\*

\*Corresponding author. Email: jian.yang.qt@gmail.com

Published 14 August 2019, *Sci. Adv.* **5**, eaaw3538 (2019)  
DOI: 10.1126/sciadv.aaw3538

#### This PDF file includes:

Note S1. Theoretical derivation of vQTL as a consequence of GEI  
Note S2. The Bartlett's test, the FK test, and the DGLM test  
Note S3. Rank-based inverse-normal transformation  
Note S4. The effective number of independent traits  
Note S5. Definitions of the three environmental factors—PA, SB, and smoking  
Note S6. Expected inflation in the Levene's test statistic due to phantom vQTL effect  
Note S7. Acknowledgments  
Fig. S1. Evaluation of statistical methods and phenotype processing strategies for the vQTL analysis by simulation based on a single-SNP model.  
Fig. S2. Phenotypic correlations among 13 quantitative traits, and PA and SB measures in the UKB.  
Fig. S3. Genome-wide vQTL and QTL analyses for 13 traits in the UKB.  
Fig. S4. Quantile-quantile plots of vQTL associations for the 13 UKB traits.  
Fig. S5. Enrichment of GEI effects among the 75 vQTLs compared with a random set of QTLs using the raw phenotypic values.  
Fig. S6. Comparison of the Young *et al.* method with the Levene's test by vQTL simulation.  
Fig. S7. Excluding two alternative explanations for vQTL signals: Phantom vQTLs and epistasis.  
Table S1. Descriptive summary of (A) the quantitative traits and (B) the environmental data used in this study from the UKB.  
Table S2. Seventy-five experiment-wise significant vQTLs for nine UKB traits.  
Table S3. GEI examples.  
References (68–75)

## Supplementary Notes

### Note S1. Theoretical derivation of vQTL as a consequence of GEI

It has been shown by Pare et al.<sup>17</sup> that the interaction of a genetic variant with a genetic or environmental factor for a trait (e.g., GEI) can lead to differences in variance of the trait across genotype classes of the variant. Take GEI as an example. Under a GEI model, a phenotype  $y$  is affected by a genetic variant  $x_g$ , an environmental factor  $x_E$ , and an interaction term  $x_g x_E$ , i.e.

$$y = \mu + \beta_g x_g + \beta_E x_E + \beta_{gE} x_g x_E + e$$

where  $\mu$  is the intercept term,  $\beta_g, \beta_E, \beta_{gE}$  are the effects of  $x_g, x_E$  and  $x_g x_E$ , respectively, and  $e$  is the residual. The phenotypic variance conditional on the genotype of the variant is

$$\begin{aligned} \text{Var}(y|x_g) &= \text{Var}(\mu + \beta_g x_g + \beta_E x_E + \beta_{gE} x_g x_E + e) \\ &= \text{Var}((\beta_E + \beta_{gE} x_g) x_E + \mu + \beta_g x_g + e) \\ &= (\beta_E + \beta_{gE} x_g)^2 \text{Var}(x_E) + \text{Var}(e) \end{aligned}$$

assuming that  $x_g, x_E$  and  $e$  are independent of each other. This equation shows that the phenotypic variance given a genotype is dependent on the genotype in the presence of GEI (i.e.,  $\beta_{gE} \neq 0$ ).

### Note S2. The Bartlett's test, the FK test, and the DGLM test

We evaluated four variance quantitative trait locus (vQTL) methods by simulation. Details of the Levene's test have been described in the Methods section of the main text, and details of the other three methods are described below.

The Bartlett's test<sup>29</sup> is one of the earliest methods used to test the inequality of variance but known to be sensitive to the violation of normality assumption<sup>28</sup>. The Bartlett's test-statistic is

$$\frac{(n-k) \ln(S_p^2) - \sum_{i=1}^k (n_i - 1) \ln(S_i^2)}{1 + \frac{1}{3(k-1)} \left( \sum_{i=1}^k \left( \frac{1}{n_i - 1} \right) - \frac{1}{n - k} \right)} \sim \chi_{k-1}^2$$

where  $n$  is the total sample size;  $k$  is the number of groups;  $n_i$  is the sample size of the  $i$ -th group,  $n = \sum_{i=1}^k n_i$ ;  $S_i^2$  is the sample variance in the  $i$ -th group;  $S_p^2$  is the pooled estimate of the variance,  $S_p^2 = \frac{1}{n-k} \sum_{i=1}^k (n_i - 1) S_i^2$ . We used the *bartlett.test()* function in R for data analysis.

The Fligner-Killeen (median) test<sup>32</sup> is a rank-based method with similar performance to the Levene's test. The Fligner-Killeen test-statistic is

$$\frac{\sum_{i=1}^k n_i (\bar{A}_i - \bar{a})^2}{V^2} \sim \chi_{k-1}^2$$

where  $n$  is the total sample size;  $k$  is the number of groups;  $n_i$  is the sample size of the  $i$ -th group,  $n = \sum_{i=1}^k n_i$ ;  $a$  is the “rank score” assigned by  $\Phi^{-1}(\frac{1+j}{n+1})$  with  $j$  being the rank of all observations based on  $|y_{ij} - \tilde{y}_i|$ ,  $\tilde{y}_i$  being the median of the  $i$ -th group and  $\Phi^{-1}$  being the standard normal quantile function;  $\bar{A}_i$  is the mean rank score of the  $i$ -th group;  $\bar{a}$  is the mean rank score of all observations;  $V^2$  is the sample variance of rank scores of all observations. We used the *fligner.test()* function in R for data analysis.

Ronnegard et al.<sup>33,34</sup> proposed a double generalized linear model (DGLM)<sup>35</sup> that contained two linear models, one for the effect on the trait mean and the other for the effect on the trait variance

$$E(y|u, u_d) = \mu; \mu = Xb + Zu$$

$$var(y|u, u_d) = \phi; \log(\phi) = X_d b_d + Z_d u_d$$

where  $y$  is the phenotype;  $u$  and  $u_d$  are the random effects on the mean and variance (dispersion), respectively;  $b$  and  $b_d$  are the fixed effects on the mean and variance (dispersion), respectively. We used “dglm” package in R for data analysis.

**Note S3. Rank-based inverse-normal transformation**

We used the simulated data to compare several phenotype processing strategies. Rank-based inverse-normal transformation (RINT) was conducted based on the formula below<sup>68,69</sup>

$$y_i^t = \Phi^{-1}\left(\frac{r_i - c}{n - 2c + 1}\right)$$

where  $r_i$  is the ordinary rank of the  $i$ -th observation;  $n$  is the total number of observations;  $c$  is a constant value (set to 0.5 in this study);  $\Phi^{-1}$  is the standard normal quantile function;  $y_i^t$  is the transformed value for the  $i$ -th observation. For RINT after covariate adjustment, we first adjusted the phenotypes for covariates and then transformed the residuals by RINT.

**Note S4. The effective number of independent traits**

As some phenotypes were correlated with each other (Figure S2a), we used an eigendecomposition analysis to estimate the effective number of independent traits<sup>66</sup>. Let  $\mathbf{y}$  be a vector of  $p$  phenotypes and  $\mathbf{V}$  be the variance-covariance matrix of vector  $\mathbf{y}$ . The eigen decomposition of matrix  $\mathbf{V}$  is

$$\mathbf{V} = \mathbf{Q}'\mathbf{\Lambda}\mathbf{Q}$$

where  $\mathbf{Q}$  is the matrix of eigenvectors and  $\mathbf{\Lambda}$  is the diagonal matrix comprised of the ordered eigenvalues  $\lambda_1 \dots \lambda_p$ . The effective number of  $p$  phenotypes can be estimated as<sup>66</sup>

$$\frac{(\sum_{k=1}^p \lambda_k)^2}{\sum_{k=1}^p \lambda_k^2}$$

**Note S5. Definitions of the three environmental factors—PA, SB, and smoking**

Physical activity (PA) was assessed based on the questions from International Physical Activity Questionnaire (IPAQ)<sup>70</sup>, including the number of days per week of walking (DayW), the number of days per week of moderate physical activity (DayM), the number of days per week of vigorous physical activity more than 10 minutes (DayV), the duration of walking (DurW), the duration of moderate physical activity (DurM), and the duration of vigorous physical activity (DurV) (Table S1b). According to the IPAQ analysis guideline<sup>67</sup>, the metabolic equivalents (MET)

minutes for walking (METW), moderate physical activity (METM), vigorous physical activity (METV), and the total MET (METT) minutes were calculated by

$$\text{METW} = 3.3 \times \text{DayW} \times \text{DurW}$$

$$\text{METM} = 4.0 \times \text{DayM} \times \text{DurM}$$

$$\text{METV} = 8.0 \times \text{DayV} \times \text{DurV}$$

$$\text{METT} = \text{METW} + \text{METM} + \text{METV}$$

The physical activity level was then labelled as 1) “high” (coded as 3) when “DayV $\geq$ 3 and METT $\geq$ 1500” or “DayW+DayM+DayV $\geq$ 7 and METT $\geq$ 3000”; 2) “moderate” (coded as 2) when “DayV $\geq$ 3 and DurV $\geq$ 20” or “DayM $\geq$ 5 and DurM $\geq$ 30” or “DayW $\geq$ 5 and DurW $\geq$ 30” or “DayW+DayM+DayV $\geq$ 5 and METT $\geq$ 600”; 3) “low” (coded as 1) when no activity or some activity was reported but not enough to meet the criteria above.

Sedentary behaviour (SB) was defined as the sum of the time spent driving (TimeD), non-work-related computer using (TimeC) or TV watching (TimeTV) (Table S1b). We removed outliers 5 SD from the mean; the remaining data ranged from 0 to 17 hours.

Smoking was assessed based on the answers to two questions about current tobacco smoking (CurS) and past tobacco smoking (PastS) (Table S1b). Individuals were classified as “never smoker” (coded as 0) if CurS = “no” and PastS = “tried once or twice” or “never”. Individuals were classified as “ever smoker” (coded as 1) if CurS = “most days” or “occasionally”, or PastS = “most days” or “occasionally”.

## Note S6. Expected inflation in the Levene's test statistic due to phantom vQTL effect

### 6.1 Two loci

Let us consider two genetic loci A and B, and let  $p_A$  and  $p_B$  denote the frequencies of the major alleles of A and B, respectively, and  $p_{AB}$  denote the haplotype frequency of the two major alleles. We know that the LD (including D, D' and  $r^2$ ) between the two loci, the genotype frequencies of the two loci, and the genotype frequency of locus A conditional on locus B are a function of  $p_A$ ,  $p_B$  and  $p_{AB}$ <sup>71</sup>.

#### Allele and haplotype frequencies

| Locus A          | Locus B                 |                                   | Allele frequency |
|------------------|-------------------------|-----------------------------------|------------------|
|                  | Major allele B          | Minor allele b                    |                  |
| Major allele A   | $p_{AB}$                | $p_{Ab} = p_A - p_{AB}$           | $p_A$            |
| Minor allele a   | $p_{aB} = p_B - p_{AB}$ | $p_{ab} = 1 - p_A - p_B + p_{AB}$ | $p_a = 1 - p_A$  |
| Allele frequency | $p_B$                   | $p_b = 1 - p_B$                   | 1                |

#### $p_{AB}$ and LD between A and B as a function of $p_A$ and $p_B$

| Measures | Definition                                                                                                                              | Maximum value                                                                | Minimum value         |
|----------|-----------------------------------------------------------------------------------------------------------------------------------------|------------------------------------------------------------------------------|-----------------------|
| $p_{AB}$ | -                                                                                                                                       | $\min[p_A, p_B]$                                                             | $p_A + p_B - 1$       |
| D        | $D = p_{AB} - p_A \times p_B$                                                                                                           | $\min[p_A(1 - p_B), p_B(1 - p_A)]$                                           | $-(1 - p_A)(1 - p_B)$ |
| D'       | $D' = \frac{D}{\min[p_A(1 - p_B), p_B(1 - p_A)]}$ , if D<br>$> 0$<br>$D' = \frac{D}{\min[p_A p_B, (1 - p_A)(1 - p_B)]}$ , if D<br>$< 0$ | 1                                                                            | -1                    |
| $r^2$    | $r^2 = \frac{D^2}{p_A p_B (1 - p_A)(1 - p_B)}$                                                                                          | $\min[\frac{p_A(1 - p_B)}{(1 - p_A)p_B}, \frac{(1 - p_A)p_B}{p_A(1 - p_B)}]$ | 0                     |

#### Genotype frequencies of the two loci

|             | Genotype BB           | Genotype Bb                                             | Genotype bb                              | Genotype Frequency |
|-------------|-----------------------|---------------------------------------------------------|------------------------------------------|--------------------|
| Genotype AA | $p_{AABB} = p_{AB}^2$ | $p_{AABb} = 2p_{AB}p_{Ab}$<br>$= 2p_{AB}(p_A - p_{AB})$ | $p_{AAbb} = p_{Ab}^2 = (p_A - p_{AB})^2$ | $p_A^2$            |

|                    |                                                         |                                                                                                                          |                                                                                |                 |
|--------------------|---------------------------------------------------------|--------------------------------------------------------------------------------------------------------------------------|--------------------------------------------------------------------------------|-----------------|
| Genotype Aa        | $p_{AaBB} = 2p_{AB}p_{aB}$<br>$= 2p_{AB}(p_B - p_{AB})$ | $p_{AaBb} = 2(p_{AB}p_{ab} + p_{Ab}p_{aB})$<br>$= 2[p_{AB}(1 - p_A - p_B + p_{AB})$<br>$+ (p_A - p_{AB})(p_B - p_{AB})]$ | $p_{Aabb} = 2p_{Ab}p_{ab}$<br>$= 2(p_A - p_{AB})(1 - p_A - p_B$<br>$+ p_{AB})$ | $2p_A(1 - p_A)$ |
| Genotype aa        | $p_{aaBB} = p_{aB}^2$<br>$= (p_B - p_{AB})^2$           | $p_{aaBb} = 2p_{aB}p_{ab}$<br>$= 2(p_B - p_{AB})(1 - p_A - p_B$<br>$+ p_{AB})$                                           | $p_{aabb} = p_{ab}^2$<br>$= (1 - p_A - p_B + p_{AB})^2$                        | $(1 - p_A)^2$   |
| Genotype Frequency | $p_B^2$                                                 | $2p_B(1 - p_B)$                                                                                                          | $(1 - p_B)^2$                                                                  | 1               |

Genotype frequency of locus A conditioning on locus B

| Genotype | AA                                                                                      | Aa                                                                                                                               | aa                                                                                                        |
|----------|-----------------------------------------------------------------------------------------|----------------------------------------------------------------------------------------------------------------------------------|-----------------------------------------------------------------------------------------------------------|
| BB       | $P(AA   BB) = \frac{p_{AABB}}{p_{BB}}$<br>$= \frac{p_{AB}^2}{p_B^2}$                    | $P(Aa   BB) = \frac{p_{AaBB}}{p_{BB}}$<br>$= \frac{2p_{AB}(p_B - p_{AB})}{p_B^2}$                                                | $P(aa   BB) = \frac{p_{aaBB}}{p_{BB}}$<br>$= \frac{(p_B - p_{AB})^2}{p_B^2}$                              |
| Bb       | $P(AA   Bb) = \frac{p_{AABb}}{p_{Bb}}$<br>$= \frac{p_{AB}(p_A - p_{AB})}{p_B(1 - p_B)}$ | $P(Aa   Bb) = \frac{p_{AaBb}}{p_{Bb}}$<br>$= \frac{p_{AB}(1 - p_A - p_B + p_{AB}) + (p_A - p_{AB})(p_B - p_{AB})}{p_B(1 - p_B)}$ | $P(aa   Bb) = \frac{p_{aaBb}}{p_{Bb}}$<br>$= \frac{(p_B - p_{AB})(1 - p_A - p_B + p_{AB})}{p_B(1 - p_B)}$ |
| bb       | $P(AA   bb) = \frac{p_{Aabb}}{p_{bb}}$<br>$= \frac{(p_A - p_{AB})^2}{(1 - p_B)^2}$      | $P(Aa   bb) = \frac{p_{Aabb}}{p_{bb}}$<br>$= \frac{2(p_A - p_{AB})(1 - p_A - p_B + p_{AB})}{(1 - p_B)^2}$                        | $P(aa   bb) = \frac{p_{aabb}}{p_{bb}}$<br>$= \frac{(1 - p_A - p_B + p_{AB})^2}{(1 - p_B)^2}$              |

## 6.2 Causal variant (locus A) with an additive genetic effect

Let us assume that locus A is the causal variant with an additive genetic effect ( $b_c$ ) on a phenotype

$$y \sim (\mu + b_c x_a, \sigma^2)$$

| Genotype | Code ( $x_a$ ) | $E(y x_a)$   | $Var(y x_a)$ | $E(y^2 x_a)$                |
|----------|----------------|--------------|--------------|-----------------------------|
| AA       | 0              | $\mu$        | $\sigma^2$   | $\sigma^2 + \mu^2$          |
| Aa       | 1              | $\mu + b_c$  | $\sigma^2$   | $\sigma^2 + (\mu + b_c)^2$  |
| aa       | 2              | $\mu + 2b_c$ | $\sigma^2$   | $\sigma^2 + (\mu + 2b_c)^2$ |

The expected phenotypic mean and variance given a genotype of locus B (marker) can be found in the tables below.

| Genotype | Code ( $x_b$ ) | $E(y/x_b)$                                                                                                                                                                    |
|----------|----------------|-------------------------------------------------------------------------------------------------------------------------------------------------------------------------------|
| BB       | 0              | $\mu + \frac{2b_c(p_B - p_{AB})}{p_B}$                                                                                                                                        |
| Bb       | 1              | $\mu + \frac{b_c(2p_B - p_{AB} - 2p_B^2 + 2p_B p_{AB} - p_A p_B)}{p_B(1 - p_B)}$<br>$= \mu + \frac{b_c[(p_B - p_{AB})(1 - p_B) + (1 - p_A - p_B + p_{AB})p_B]}{p_B(1 - p_B)}$ |
| bb       | 2              | $\mu + \frac{2b_c(1 - p_A - p_B + p_{AB})}{1 - p_B}$                                                                                                                          |

---


$$Var(y/x_b)$$


---


$$\sigma^2 + \frac{2b_c^2(p_B - p_{AB})p_{AB}}{p_B^2}$$

$$+ \frac{b_c^2(p_B p_{AB} - p_{AB}^2 + 2p_B p_{AB}^2 - 3p_B^2 p_{AB} + p_A p_B^2 - 2p_B^2 p_{AB}^2 + 2p_A p_B^2 p_{AB} + 2p_B^3 p_{AB} - p_A p_B^3 - p_A^2 p_B^2)}{p_B^2(1 - p_B)^2}$$

$$= \sigma^2 + \frac{b_c^2[(p_B - p_{AB})p_{AB}(1 - p_B)^2 + (1 - p_A - p_B + p_{AB})(p_A - p_{AB})p_B^2]}{p_B^2(1 - p_B)^2}$$

$$\sigma^2 + \frac{2b_c^2(1 - p_A - p_B + p_{AB})(p_A - p_{AB})}{(1 - p_B)^2}$$


---

We therefore can observe an additive effect on both mean ( $b_m$ ) and variance ( $\beta_m$ ) at the marker (locus B)

$$y \sim (\mu_m + b_m x_b, \sigma_m^2 + \beta_m x_b)$$

where

- $\mu_m = \mu + \frac{2b_c(p_B - p_{AB})}{p_B}$
- $b_m = \frac{b_c(p_{AB} - p_A p_B)}{p_B(1 - p_B)}$

$$\begin{aligned}
- \quad \sigma_m^2 &= \sigma^2 + \frac{2b_c^2(p_B - p_{AB})p_{AB}}{p_B^2} \\
- \quad \beta_m &= \frac{b_c^2[(1-2p_B)p_{AB}^2 + (2p_A p_B + p_B - 1)p_B p_{AB} + (1-p_A - p_B)p_A p_B^2]}{p_B^2(1-p_B)^2}
\end{aligned}$$

### 6.3 QTL test-statistics at the marker variant (locus B)

Assuming phenotypic variance of 1 (i.e.,  $\text{var}(y) = 1$ ), the variance explained by the marker variant ( $q_m^2$ ) and the non-centrality parameter (NCP) of a chi-squared test for QTL effect at the marker can be written as

$$\begin{aligned}
- \quad q_m^2 &= 2p_B(1 - p_B)b_m^2 = 2p_B(1 - p_B) \frac{b_c^2(p_{AB} - p_A p_B)^2}{p_B^2(1-p_B)^2} = \\
- \quad 2p_A(1 - p_A)b_c^2 &\frac{(p_{AB} - p_A p_B)^2}{p_A(1-p_A)p_B(1-p_B)} = q_c^2 r^2 \\
- \quad \text{NCP} &= \frac{nq_m^2}{1 - q_m^2} = \frac{nq_c^2 r^2}{1 - q_c^2 r^2}
\end{aligned}$$

where  $n$  is the sample size,  $q_c^2$  is the variance explained by the causal variant, and  $r^2$  is the LD between the causal and the marker variants. This derivation is consistent with that in previous studies<sup>72,73</sup>.

### 6.4 vQTL test statistic at the marker variant (locus B)

Under normality assumption, the distribution of the phenotype with respect to the marker variant can be written as

$$y \sim N(\mu_m + b_m x_b, \sigma_m^2 + \beta_m x_b)$$

We then have

$$y - E(y|x_b) \sim N(0, \sigma_m^2 + \beta_m x_b)$$

and  $z = |y - \tilde{y}|$

$$z = |y - \tilde{y}| = |y - E(y|x_b)|$$

$$\sim \text{Folded Normal Distribution}(\sqrt{\frac{2}{\pi}(\sigma_m^2 + \beta_m x_b)}, (1 - \frac{2}{\pi})(\sigma_m^2 + \beta_m x_b))$$

| Genotype | Code ( $x_b$ ) | $E(z x_b)$                                    | $\text{var}(z x_b)$                          | $E(z^2 x_b)$            |
|----------|----------------|-----------------------------------------------|----------------------------------------------|-------------------------|
| BB       | 0              | $\sqrt{\frac{2}{\pi}\sigma_m^2}$              | $(1 - \frac{2}{\pi})\sigma_m^2$              | $\sigma_m^2$            |
| Bb       | 1              | $\sqrt{\frac{2}{\pi}(\sigma_m^2 + \beta_m)}$  | $(1 - \frac{2}{\pi})(\sigma_m^2 + \beta_m)$  | $\sigma_m^2 + \beta_m$  |
| bb       | 2              | $\sqrt{\frac{2}{\pi}(\sigma_m^2 + 2\beta_m)}$ | $(1 - \frac{2}{\pi})(\sigma_m^2 + 2\beta_m)$ | $\sigma_m^2 + 2\beta_m$ |

$$E(z) = E(z|x_b = 0)P(x_b = 0) + E(z|x_b = 1)P(x_b = 1) + E(z|x_b = 2)P(x_b = 2)$$

$$= \sqrt{\frac{2}{\pi}\sigma_m^2}p_B^2 + \sqrt{\frac{2}{\pi}(\sigma_m^2 + \beta_m)}2p_B(1 - p_B) + \sqrt{\frac{2}{\pi}(\sigma_m^2 + 2\beta_m)}(1 - p_B)^2$$

$$E(z^2) = E(z^2|x_b = 0)P(x_b = 0) + E(z^2|x_b = 1)P(x_b = 1) + E(z^2|x_b = 2)P(x_b = 2)$$

$$= \sigma_m^2 p_B^2 + (\sigma_m^2 + \beta_m)2p_B(1 - p_B) + (\sigma_m^2 + 2\beta_m)(1 - p_B)^2$$

$$= \sigma_m^2 + 2(1 - p_B)\beta_m$$

$$\text{var}(z) = E(z^2) - [E(z)]^2 = \sigma_m^2 + 2(1 - p_B)\beta_m - [E(z)]^2$$

The Levene's test is essentially one-way ANOVA test on the variable  $z$  (see the Methods section).

We therefore have

$$E(SST) = E[\sum_{i=1}^k \sum_{j=1}^{n_i} (z_{ij} - z_{..})^2] = \text{Var}(z)n = (\sigma_m^2 + 2(1 - p_B)\beta_m - [E(z)]^2)n;$$

$$\begin{aligned}
E(SSE) &= E \left[ \sum_{i=1}^k \sum_{j=1}^{n_i} (z_{ij} - z_{i.})^2 \right] \\
&= (1 - \frac{2}{\pi}) \sigma_m^2 n p_B^2 + (1 - \frac{2}{\pi}) (\sigma_m^2 + \beta_m) n 2 p_B (1 - p_B) + (1 - \frac{2}{\pi}) (\sigma_m^2 + 2 \beta_m) (1 - p_B)^2 \\
&= (1 - \frac{2}{\pi}) (\sigma_m^2 + 2(1 - p_B) \beta_m) n; \\
E(SSR) &= E(SST - SSE) = [\frac{2}{\pi} (\sigma_m^2 + 2(1 - p_B) \beta_m) - [E(z)]^2] n;
\end{aligned}$$

$$\begin{aligned}
F_{\text{Levene}} &= \frac{(n-3)E(SSR)}{(3-1)E(SSE)} \approx \frac{n E(SSR)}{2 E(SSE)} = \frac{n \frac{2}{\pi} (\sigma_m^2 + 2(1 - p_B) \beta_m) - [E(z)]^2}{(1 - \frac{2}{\pi}) (\sigma_m^2 + 2(1 - p_B) \beta_m)} \\
&= \frac{n}{\pi - 2} \left( 1 - \frac{[\sqrt{\sigma_m^2} p_B^2 + \sqrt{\sigma_m^2 + \beta_m} 2 p_B (1 - p_B) + \sqrt{\sigma_m^2 + 2 \beta_m} (1 - p_B)^2]^2}{\sigma_m^2 + 2(1 - p_B) \beta_m} \right)
\end{aligned}$$

where  $F_{\text{Levene}}$  is the Levene's  $F$ -statistic;  $SST$ ,  $SSR$  and  $SSE$  are the total sum of squares, regression sum of squares and error sum of squares, respectively, as defined in an ANOVA analysis.

Given that  $\text{var}(y) = 1$ , we can replace  $b_c^2$  with  $\frac{q_c^2}{2p_A(1-p_A)}$ , and  $\sigma^2$  with  $1 - q_c^2$

$$\beta_m = \frac{q_c^2 [(1 - 2p_B) p_{AB}^2 + (2p_A p_B + p_B - 1) p_B p_{AB} + (1 - p_A - p_B) p_A p_B^2]}{2p_A(1 - p_A) p_B^2 (1 - p_B)^2}$$

$$\sigma_m^2 = 1 - q_c^2 + \frac{(p_B - p_{AB}) p_{AB}}{p_A(1 - p_A) p_B^2} q_c^2$$

$F_{\text{Levene}}$

$$= \frac{n}{\pi - 2} \left( 1 - \frac{[\sqrt{\sigma_m^2} p_B^2 + \sqrt{\sigma_m^2 + \beta_m} 2 p_B (1 - p_B) + \sqrt{\sigma_m^2 + 2 \beta_m} (1 - p_B)^2]^2}{\sigma_m^2 + 2(1 - p_B) \beta_m} \right)$$

Therefore, the phantom vQTL test statistic is a function of sample size  $n$ , variance explained by the causal variant  $q_c^2$ , allele frequency of the causal variant  $p_A$ , allele frequency of the marker variant  $p_B$ , and the haplotype frequency  $p_{AB}$ . This formula has been confirmed by simulation (Figure S7a). We then computed  $F_{\text{Levene}}$  given a number of parameters including  $p_{AB}$  (equivalent to  $D'$  ranging from -1 to 1),  $p_a$  (ranging from 0.001 to 0.5, equivalent to  $p_A$  from 0.999 to 0.5),  $p_b$  (ranging from 0.05 to 0.5, equivalent to  $p_B$  from 0.95 to 0.5),  $q_c^2$  (= 0.005, 0.01 or 0.02) and  $n$  (= 350,000) (Figure S7b-d).

#### **Note S7. Acknowledgments**

This study has been conducted using the UK Biobank resource under Application Number 12505. The UK Biobank was established by the Wellcome Trust medical charity, Medical Research Council, Department of Health, Scottish Government and the Northwest Regional Development Agency. It has also had funding from the Welsh Assembly Government, British Heart Foundation and Diabetes UK.

## Supplementary Figures

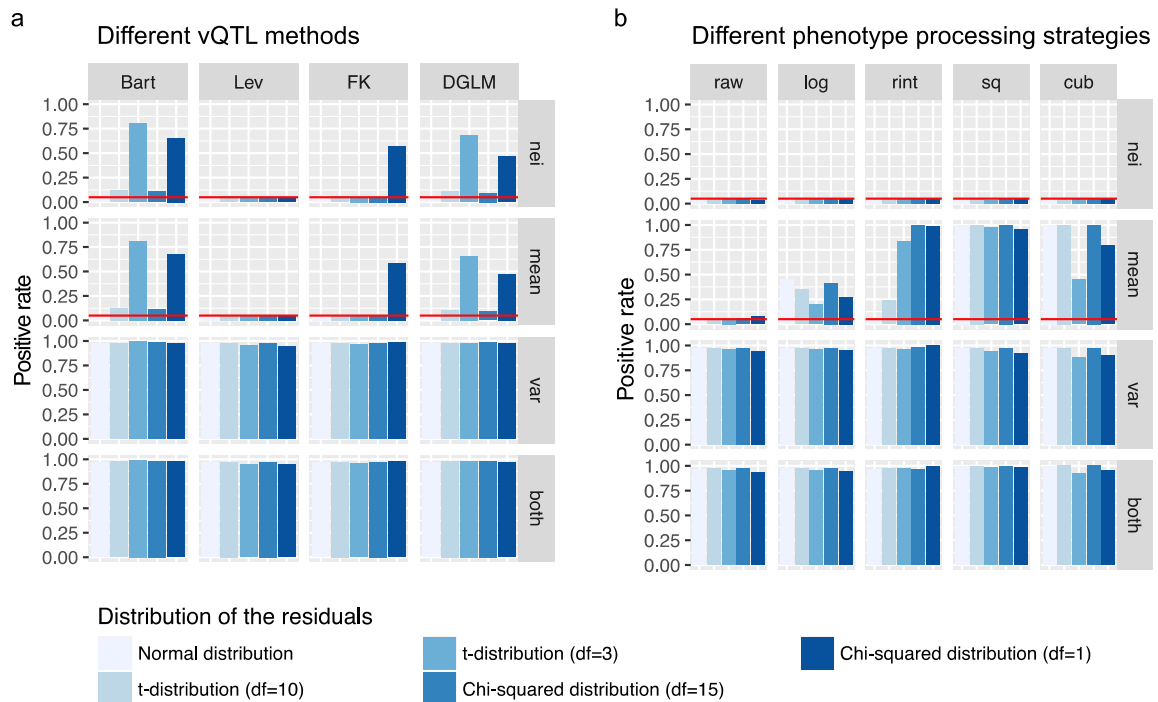

**Fig. S1. Evaluation of statistical methods and phenotype processing strategies for the vQTL analysis by simulation based on a single-SNP model.** Evaluation of statistical methods (a) and phenotype processing strategies (b) for vQTL analysis by simulation based on a single-SNP model. Phenotypes of 10,000 individuals were simulated based on one SNP and one error term in a single-SNP model (Methods). The SNPs effects were simulated under four scenarios: 1) effect on neither mean nor variance (nei), 2) effect on mean only (mean), 3) effect on variance only (var), or 4) effect on both mean and variance (both). The error term was generated from 5 different distributions: normal distribution,  $t$ -distribution with degree of freedom (df) = 10 or 3, or  $\chi^2$  distribution with df = 15 or 1. Four statistical test methods, i.e. the Bartlett's test (Bart), the Levene's test (Lev), the Fligner-Killen test (FK) and the DGLM, were used to detect vQTLs. In panel b, the Levene's test was used to analyse phenotypes processed using five strategies, i.e. raw phenotype (raw), raw phenotype adjusted for covariates (adj), rank-based inverse-normal transformation after adj (rint), logarithm transformation after adj (log), square transformation after adj (sq), and cube transformation after adj (cub). Positive rate is defined as the number of vQTLs with  $p < 0.05$  divided by the total number of tests across 1,000 simulations, which is the FPR under the null ("nei" and "mean") and power under the alternative ("var" and "both"). The red horizontal line represents an FPR of 0.05.

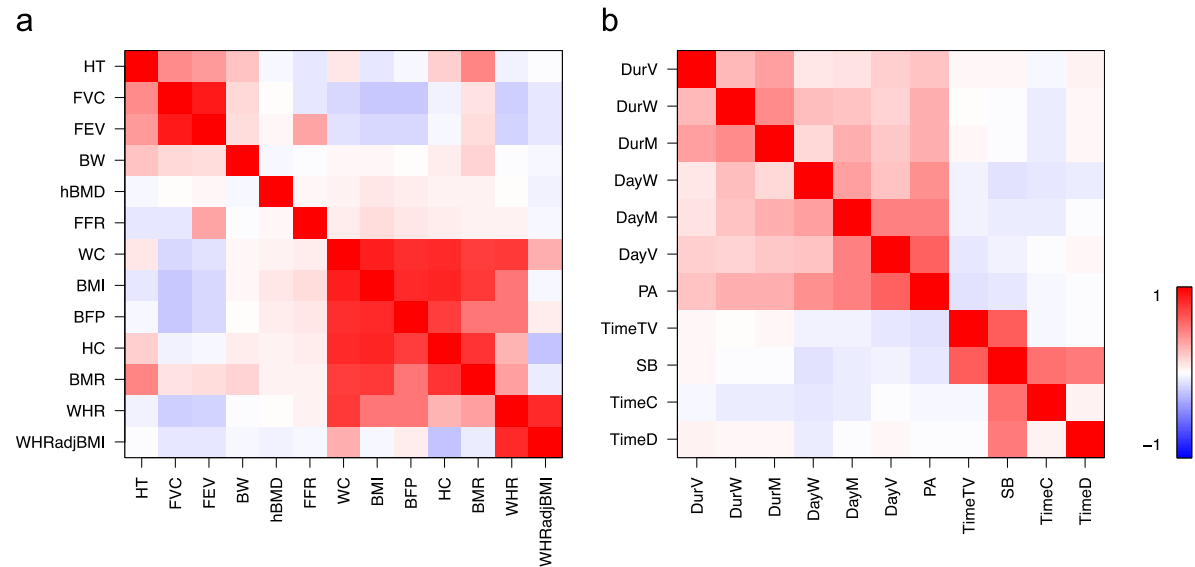

**Fig. S2. Phenotypic correlations among 13 quantitative traits, and PA and SB measures in the UKB.** Phenotypic correlations among (a) 13 quantitative traits and (b) PA and SB measures in the UKB. The Pearson's correlation coefficient was calculated between each pair of (a) the processed phenotypes or (b) the PA and SB measures. The order shown on the plot above was determined by hierarchical cluster analysis using the R function *hclust()*.

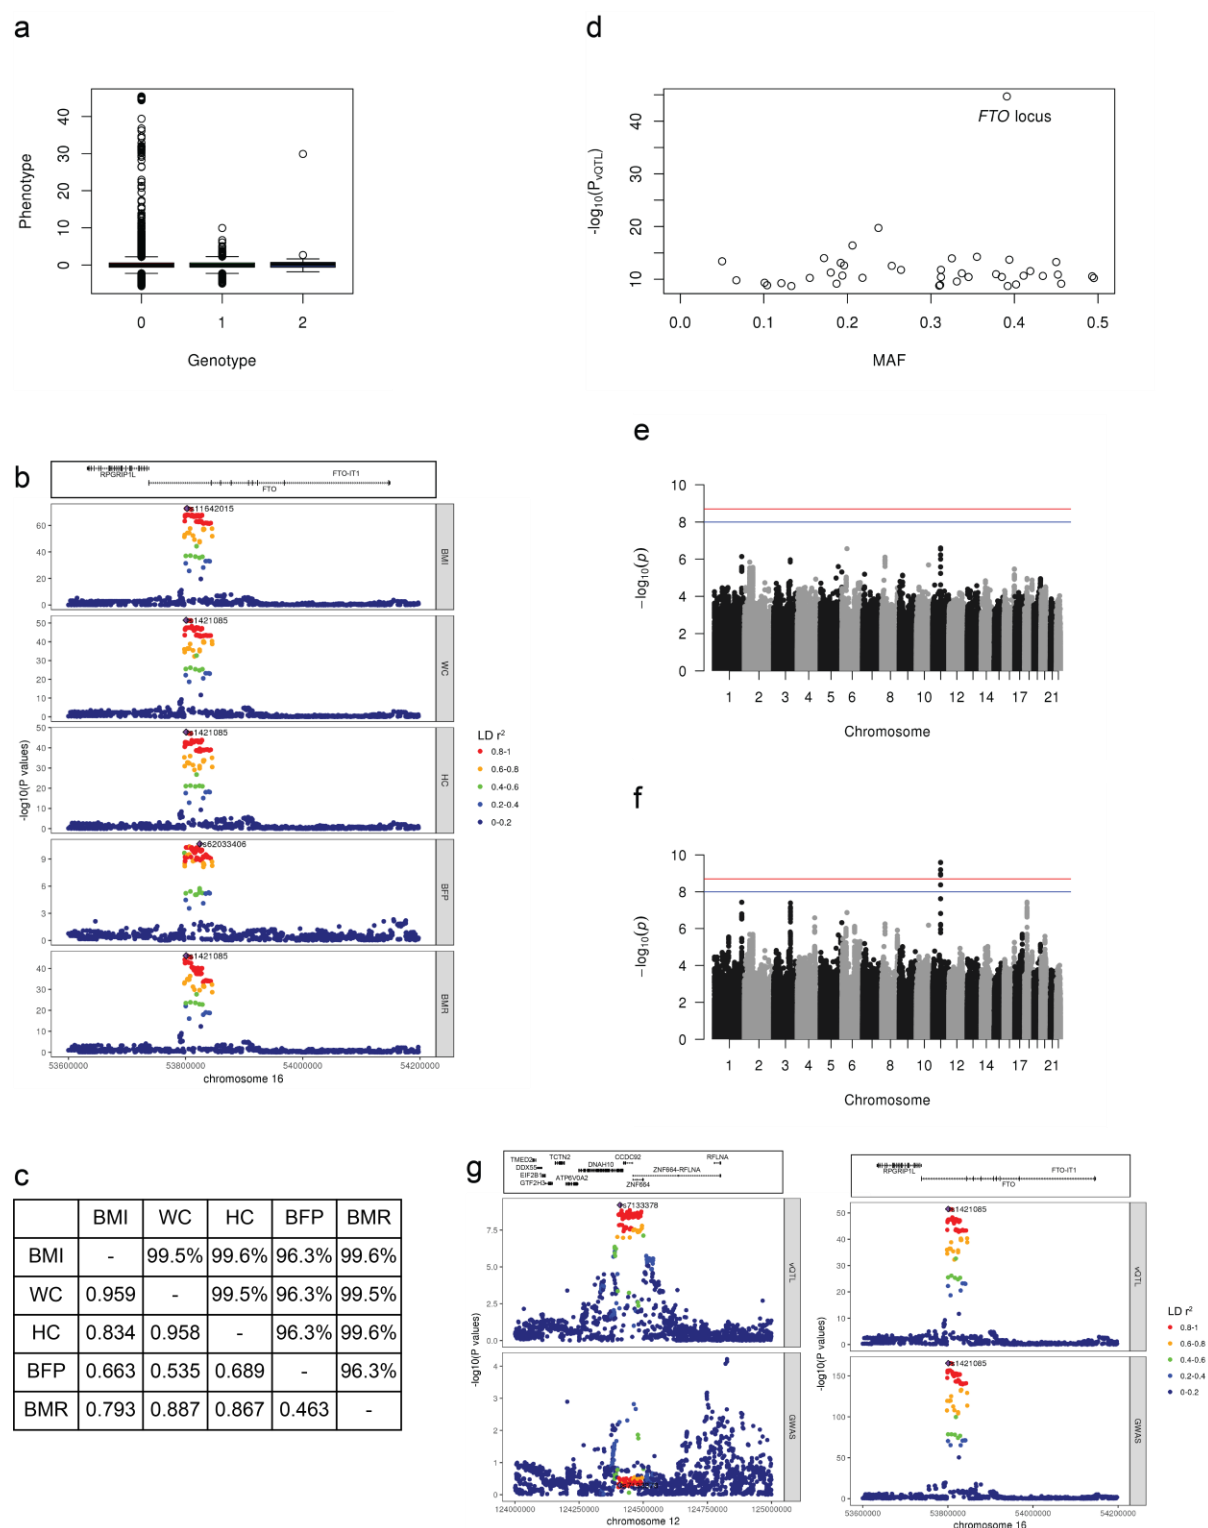

**Fig. S3. Genome-wide vQTL and QTL analyses for 13 traits in the UKB.** (a) Spurious vQTL association due to the coincidence of a minor allele with a phenotypic outlier. This is an example that a spurious vQTL signal ( $P_{vQTL} = 4.48 \times 10^{-9}$ ) at a low-MAF variant ( $MAF = 0.012$ ) is caused by the coincidence of a minor allele with a phenotypic outlier for FVC. The variance of the phenotype (after covariates adjustment and standardisation) are 1.00, 0.83 and **20.20** in the three genotype groups of rs11102024 respectively. Note that for all the other vQTL results

presented in this paper are from analyses excluding individuals with adjusted phenotypes more than 5 SD from the mean and SNPs with  $MAF < 0.05$ . (b) vQTL regional plot at the *FTO* locus for 5 traits. For each of the 5 traits for which the phenotypic variance is significantly associated with the *FTO* locus, vQTL test statistics ( $-\log_{10}(P_{vQTL})$ ) are plotted against SNP positions surrounding the top vQTL SNP (represented by a purple diamond) at the *FTO* locus. SNPs in different levels of LD with the top vQTL SNP are shown in different colours. The RefSeq genes in the top panel are extracted from the UCSC Genome Browser (URLs). (c) Colocalization and HEIDI tests for the vQTL associations at the *FTO* locus for the 5 traits. We used the COLOC<sup>74</sup> method implemented in *R* and the HEIDI method<sup>75</sup> implemented in SMR (URLs) to test whether the vQTL associations at the *FTO* locus for the 5 traits as shown in panel (b) are due to the same underlying causal variant. The COLOC and HEIDI analyses were performed for each pair of traits. Note that we convert vQTL p-values to vQTL effect sizes and standard errors using the method described in Zhu et al.<sup>75</sup> (with the direction of each vQTL effect determined by comparing the phenotypic variance among the genotype classes of a SNP) for the HEIDI analysis. The COLOC PP4 values (up-right off-diagonal), the posterior possibility for hypothesis 4 (i.e., association signals at a locus for two traits are driven by a shared causal variant), were all greater than 80%, and the HEIDI p-values (down-left off-diagonal), testing against the null hypothesis that the association signals for two traits at a locus are driven by the same set of causal variants, were all larger than 0.05. (d) A plot of test statistic ( $-\log_{10}(P_{vQTL})$ ) against MAF for the 41 independent vQTLs across traits. (e-f) Manhattan plots of genome-wide vQTL analysis for height squared (e) and cubed (f) in the UKB. Test statistics ( $-\log_{10}(P_{vQTL})$ ) of all common ( $MAF \geq 0.05$ ) SNPs from the vQTL analysis are plotted against their physical positions. The blue horizontal line represents the genome-wide significance level  $1.0 \times 10^{-8}$  and the red horizontal line represents the experiment-wise significance level  $2.0 \times 10^{-9}$ . (g) QTL and vQTL regional plots at the *CCDC92* or *FTO* locus for waist circumference. The QTL and vQTL test statistics (i.e.,  $-\log_{10}(P \text{ values})$ ) for waist circumference are plotted against SNP positions surrounding the top vQTL SNP at the *CCDC92* (panel a) or *FTO* locus (panel b). The top vQTL SNP is represented by a purple diamond. SNPs in different levels of LD with the top vQTL SNP are shown in different colours. The RefSeq genes in the top panel are extracted from the UCSC Genome Browser (URLs).

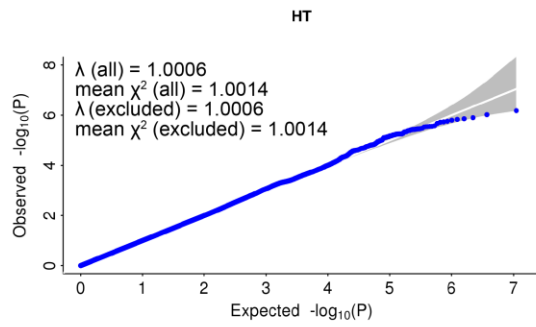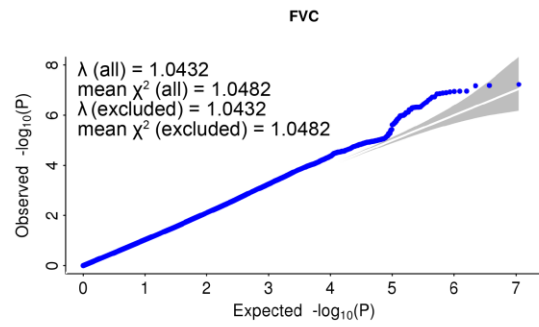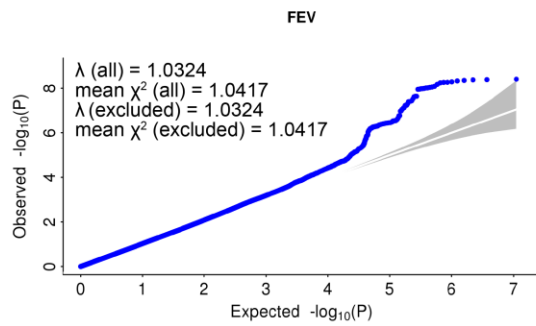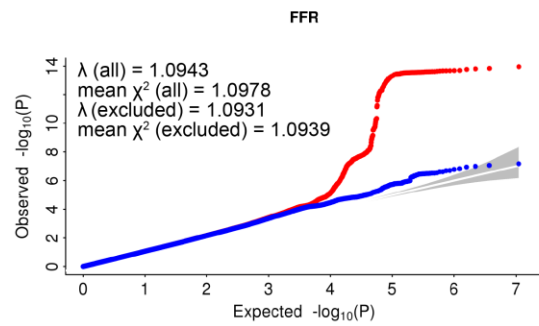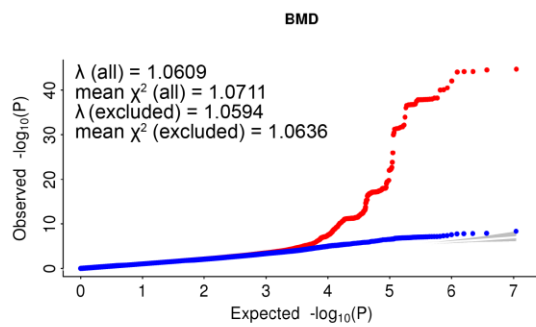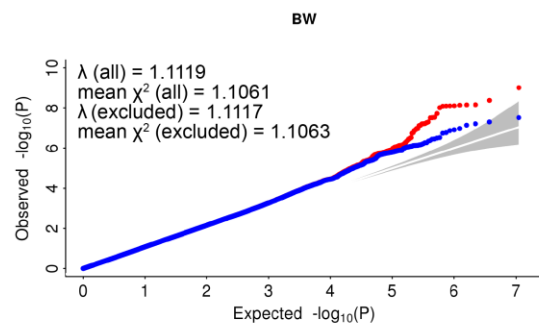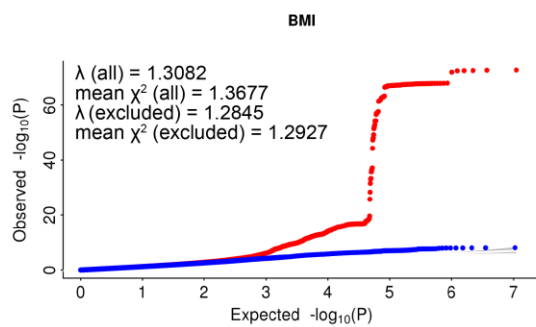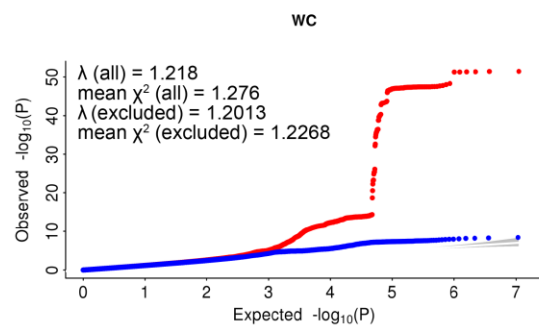

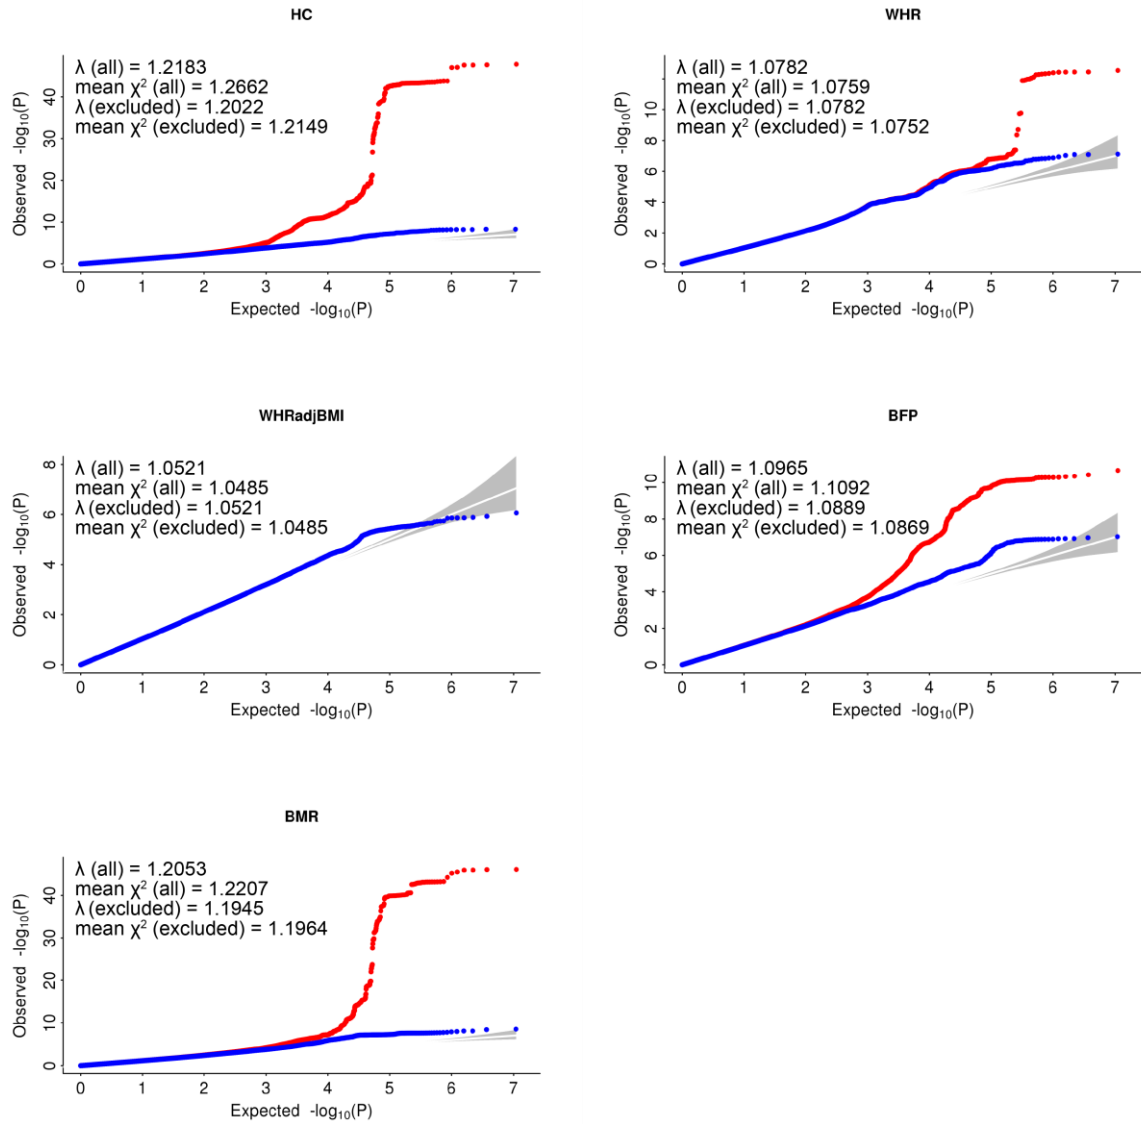

**Fig. S4. Quantile-quantile plots of vQTL associations for the 13 UKB traits.** For each trait, we shown the QQ plots for all SNPs including (red) or excluding (blue) the top vQTLs and SNPs in LD with them (determined by GCTA-LDF<sup>65</sup>). The area highlighted in grey is the 95% confidence interval.

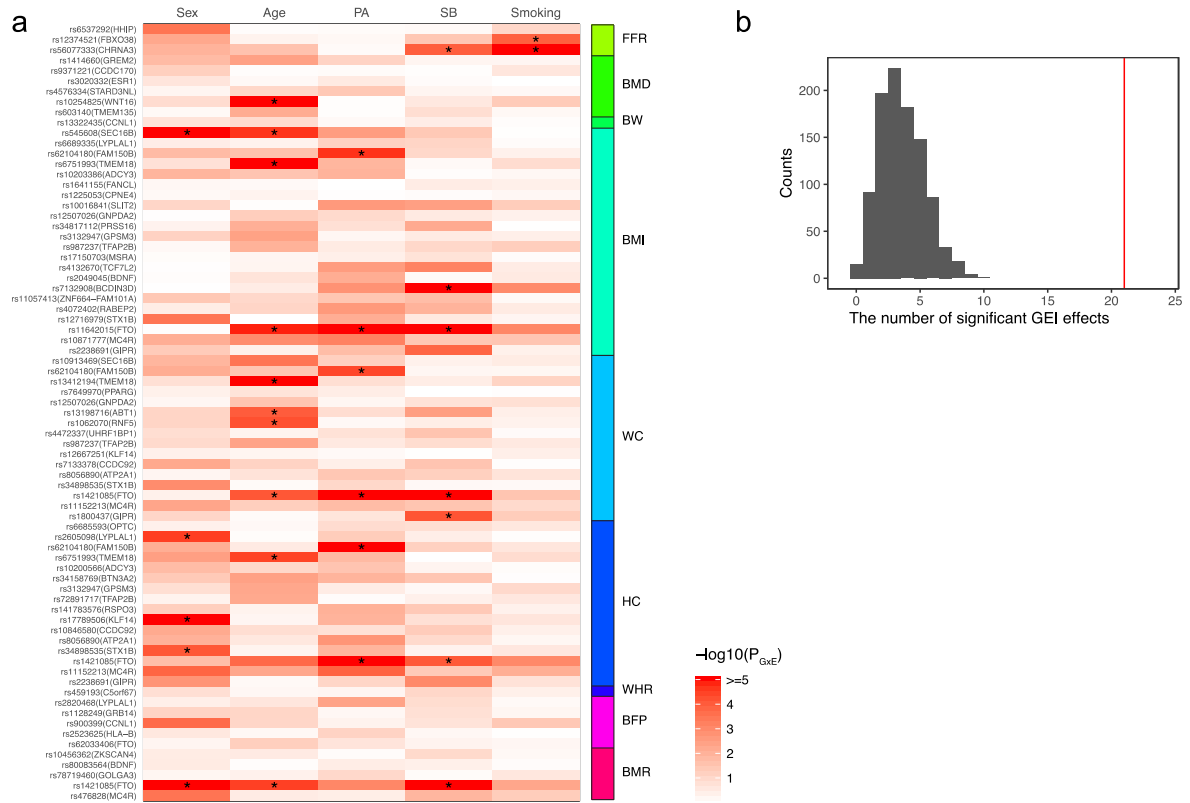

**Fig. S5. Enrichment of GEI effects among the 75 vQTLs compared with a random set of QTLs using the raw phenotypic values.** Five environmental factors, i.e., sex, age, physical activity (PA), sedentary behaviour (SB), and smoking, were used in the GEI analysis. (a) The heatmap plot of GEI test statistics ( $-\log_{10}(P_{\text{GEI}})$ ) for the 75 top vQTL SNPs. “\*” denotes significant GEI effects after Bonferroni correction ( $P_{\text{GEI}} < 1.33 \times 10^{-4} = 0.05/75/5$ ). (b) The distribution of the number of significant GEI effects for 75 top QTL SNPs randomly selected from all the top QTL SNPs with 1000 repeats (mean 3.56 and SD 1.76). The red line represents the number of significant GEI effects for the 75 top vQTL SNPs (i.e., 21).

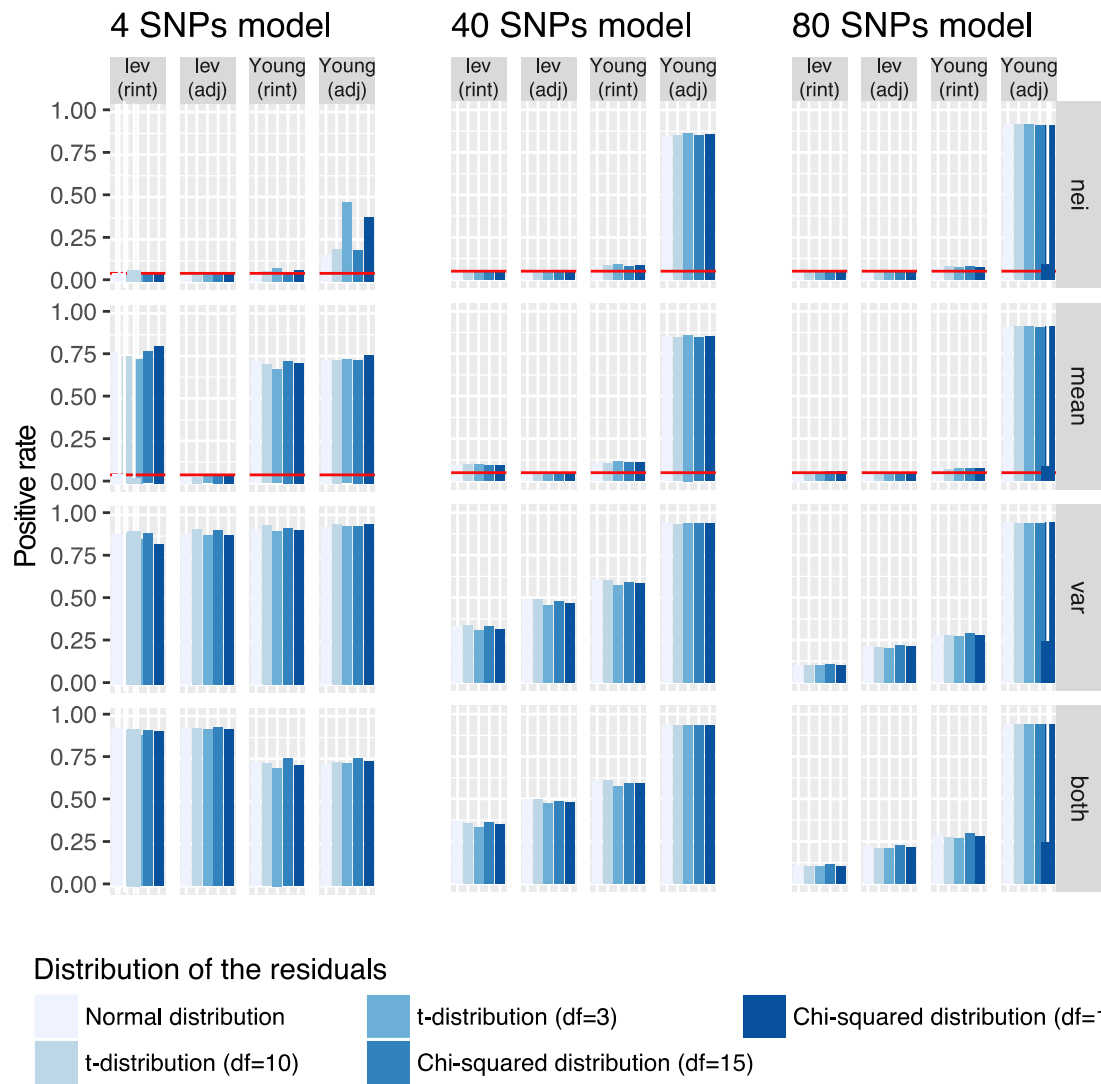

**Fig. S6. Comparison of the Young *et al.* method with the Levene's test by vQTL simulation.**

While we were preparing the manuscript, a very recent study from Young *et al.*<sup>40</sup> developed an efficient algorithm for fitting DGLM (called heteroskedastic linear mixed model or HLMM) and proposed a dispersion effect test (DET) to remove the impact of the QTL effects on the vQTL signals. We used our multiple-SNP simulation setting (Figure 2 and Methods) to quantify the FPR and power of the Young *et al.* method (HLMM + DET) in comparison with the Levene's test based on the phenotype after 1) covariate adjustment ("adj") or 2) covariate adjustment followed by rank-based inverse-normal transformation ("rint"). For the Levene's test, the positive rate (FPR or power) was computed as the number of vQTLs with  $p < 0.05$  divided by the total number of tests across 1,000 simulations. For the analysis with the Young *et al.* method, the positive rate (FPR or power) was computed as the number of vQTLs with DET  $p < 0.05$  divided by the total number of tests across simulations.

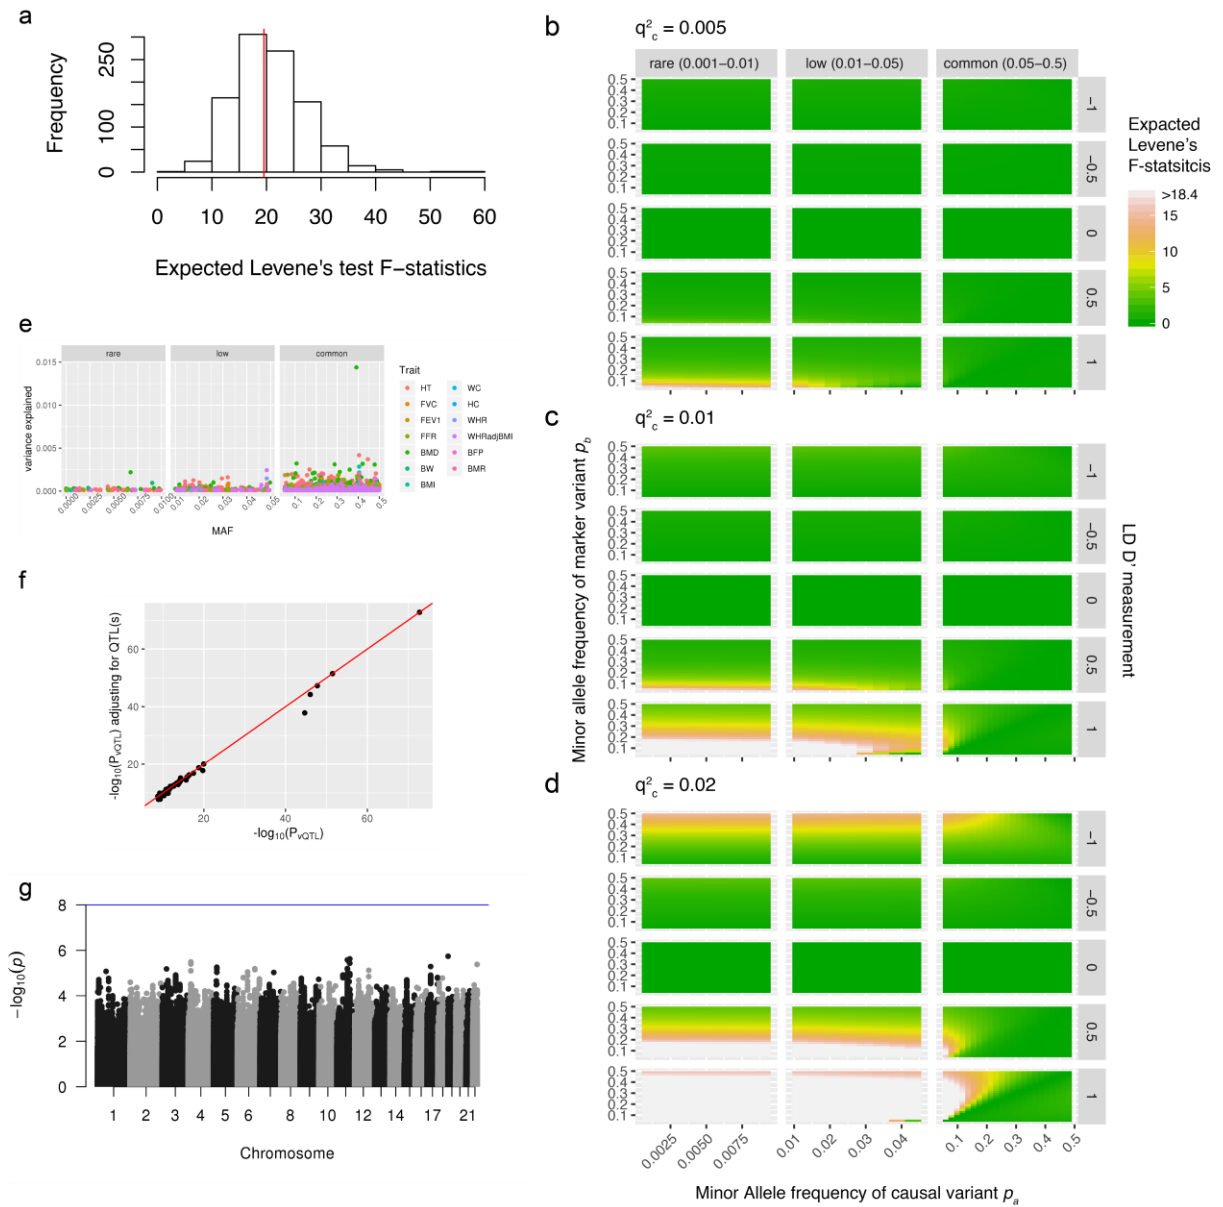

**Fig. S7. Excluding two alternative explanations for vQTL signals: Phantom vQTLs and epistasis.** (a) Verification of the expected Levene's test  $F$ -statistic due to phantom vQTL effect by simulation. We simulated two variants A ( $p_A = 0.7$ ) and B ( $p_B = 0.6$ ) in LD ( $P_{AB} = 0.6$ , LD  $r^2 = 0.64$ , and LD  $D' = 1$ ) from multinomial( $2, (P_{AB}, P_{Ab}, PaB, Pab)$ ) and a phenotype based on the causal variant A explaining 5% variance in 350,000 individuals. Shown is the distribution of  $F$ -statistics from the Levene's test using the simulated data with 1,000 replicates. The red line indicates the theoretical value based on the formula in Note S6.4. (b-d) Expected phantom vQTL  $F$ -statistics from the Levene's test. We calculated the expected phantom vQTL  $F$ -statistics given a number of parameters including  $p_{AB}$  (equivalent to LD  $D'$  from -1 to 1),  $p_a$  (ranging from 0.001 to 0.5),  $p_b$  (ranging from 0.05 to 0.5),  $q_c^2$  ( $= 0.005, 0.01$  or  $0.02$ ) and  $n$  ( $= 350,000$ ) (Note S6 for more details). An  $F$  value of 18.4 is equivalent to a genome-wide significant p-value of  $1 \times 10^{-8}$ . (e) Estimated variance explained by top QTL SNPs for the 13 UKB traits. Note that because the

phantom vQTL signals at common SNPs can be induced by rare ( $MAF \leq 0.01$ ) or low-frequency ( $0.01 \leq MAF < 0.05$ ) variants, we extended our GWAS analysis to all 44,741,800 imputed variants ( $MAF < 0.05$ ). The estimated variance explained by each GWAS top SNP is plotted against its MAF. (f) vQTL test statistics ( $-\log_{10}(P_{vQTL})$ ) from analyses with and without adjusting the phenotype for the QTL effect(s) of the top GWAS SNP(s) within 10Mb of the top vQTL SNP. The red line represents the line with slope 1 and intercept 0. (g) Manhattan plot of epistasis analysis for one of top vQTL SNPs. We conducted epistasis analysis between each of 75 top vQTL SNPs and any other SNPs in more than 10 Mb distance or on a different chromosome for the relevant trait using PLINK2<sup>63</sup> (--epistasis option). The blue horizontal line represents the genome-wide significance level (i.e.,  $p\text{-value} = 1 \times 10^{-8}$ ). Shown are the results from the epistasis analysis with the top vQTL SNP rs10913469 for waist circumference (WC).

## Supplementary Tables

**Table S1. Descriptive summary of (A) the quantitative traits and (B) the environmental data used in this study from the UKB.**

(a) 13 quantitative traits

| Trait                  | Description                                  | Sample size | UDI <sup>a</sup> |
|------------------------|----------------------------------------------|-------------|------------------|
| HT                     | Standing height                              | 347,086     | 50-0.0           |
| FVC                    | Forced vital capacity                        | 317,222     | 3062-0.0         |
| FEV1                   | Forced expiratory volume in 1-second         | 317,285     | 3063-0.0         |
| FFR <sup>b</sup>       | FEV1 and FVC ratio                           | 316,614     | NA               |
| BMD                    | Heel bone mineral density T-score, automated | 197,261     | 78-0.0           |
| BW                     | Birth weight                                 | 197,758     | 20022-0.0        |
| BMI                    | Body mass index (BMI)                        | 346,393     | 21001-0.0        |
| WC                     | Waist circumference                          | 347,158     | 48-0.0           |
| HC                     | Hip circumference                            | 346,781     | 49-0.0           |
| WHR <sup>c</sup>       | Waist to Hip Ratio                           | 347,134     | NA               |
| WHRadjBMI <sup>d</sup> | WHR adjusted for BMI                         | 346,535     | NA               |
| BFP                    | Body fat percentage                          | 341,632     | 23099-0.0        |
| BMR                    | Basal metabolic rate                         | 341,584     | 23105-0.0        |

(b) Environmental data used in the GEI analysis.

| Item   | Description                                                   | UDI <sup>a</sup> |
|--------|---------------------------------------------------------------|------------------|
| Sex    | Sex                                                           | 31-0.0           |
| Age    | Year of birth                                                 | 34-0.0           |
| DayW   | Number of days/week walked 10+ minutes                        | 864-0.0          |
| DurW   | Duration of walks                                             | 874-0.0          |
| DayM   | Number of days/week of moderate physical activity 10+ minutes | 884-0.0          |
| DurM   | Duration of moderate activity                                 | 894-0.0          |
| DayV   | Number of days/week of vigorous physical activity 10+ minutes | 904-0.0          |
| DurV   | Duration of vigorous activity                                 | 914-0.0          |
| TimeD  | Time spent driving                                            | 1090-0.0         |
| TimeC  | Time spent using computer                                     | 1080-0.0         |
| TimeTV | Time spent watching television (TV)                           | 1070-0.0         |

|       |                         |          |
|-------|-------------------------|----------|
| CurS  | Current tobacco smoking | 1239-0.0 |
| PastS | Past tobacco smoking    | 1249-0.0 |

---

Note: a) UDI, the Unique Data Identifier in the UKB dataset; b) FFR is the ratio of FEV1 to FVC; c) WHR is the ratio of waist circumference to hip circumference; d) WHRadjBMI is the residual after adjusting WHR for BMI.

**Table S2. Seventy-five experiment-wise significant vQTLs for nine UKB traits.**

(a) The vQTL and QTL tests.

| Tr<br>ait | C<br>H<br>R | SNP            | bp            | Neares<br>t Gene | MA<br>F   | vQTL<br>p-<br>value | QTL<br>p-<br>value         | Phenotypic<br>variance in<br>each<br>genotype<br>group | Phenotypic<br>mean in each<br>genotype<br>group |
|-----------|-------------|----------------|---------------|------------------|-----------|---------------------|----------------------------|--------------------------------------------------------|-------------------------------------------------|
| FF<br>R   | 4           | rs65372<br>92  | 14546<br>9968 | HHIP             | 0.3<br>94 | 1.97E<br>-14        | 3.58E-<br>122 <sup>a</sup> | 1.0217,0.993<br>6,0.9561                               | -<br>0.0453,0.0091,<br>0.0787                   |
|           |             | rs12374<br>521 | 14783<br>6880 |                  | 0.4<br>56 | 7.10E<br>-10        | 1.60E-<br>58               | 1.0223,0.997<br>8,0.97                                 | -<br>0.039,0.0055,0<br>.0417                    |
|           | 15          | rs56077<br>333 | 78899<br>003  | CHRN<br>A3       | 0.3<br>25 | 1.09E<br>-14        | 2.11E-<br>06               | 0.9757,1.010<br>7,1.0588                               | 0.0072,-<br>0.0019,-<br>0.0225                  |
| BM<br>D   | 1           | rs14146<br>60  | 24058<br>6695 | GREM<br>2        | 0.1<br>92 | 7.83E<br>-14        | 1.28E-<br>94               | 0.977,1.0362,<br>1.0452                                | -<br>0.0322,0.0523,<br>0.1304                   |
|           |             | rs93712<br>21  | 15188<br>5986 |                  | 0.1<br>01 | 4.59E<br>-10        | 1.30E-<br>76               | 1.0097,0.950<br>2,0.9408                               | 0.02,-0.0817,-<br>0.1479                        |
|           | 6           | rs30203<br>32  | 15200<br>8924 | ESR1             | 0.4<br>5  | 5.42E<br>-14        | 8.94E-<br>130              | 0.966,0.997,1<br>.0429                                 | -<br>0.074,0.0126,0<br>.0795                    |
|           | 7           | rs45763<br>34  | 38153<br>747  |                  | 0.1<br>96 | 2.36E<br>-13        | 2.60E-<br>86               | 0.9784,1.030<br>8,1.0684                               | -<br>0.0325,0.0511,<br>0.1152                   |
|           | 7           | rs10254<br>825 | 12095<br>6440 | WNT1<br>6        | 0.3<br>91 | 2.01E<br>-45        | 0                          | 0.9279,1.010<br>7,1.057                                | -<br>0.1455,0.05,0.<br>1903                     |
|           | 11          | rs60314<br>0   | 86884<br>615  | TMEM<br>135      | 0.3<br>12 | 1.61E<br>-12        | 4.48E-<br>98               | 1.0149,0.992<br>4,0.9333                               | 0.0417,-<br>0.0204,-<br>0.1142                  |
| B<br>W    | 3           | rs13322<br>435 | 15679<br>5468 | CCNL1            | 0.4<br>02 | 9.71E<br>-10        | 6.21E-<br>48               | 1.0287,0.984<br>7,0.9742                               | 0.0376,-<br>0.0072,-                            |

|         |         |         |       |       |       |        |              | 0.0585                   |                          |
|---------|---------|---------|-------|-------|-------|--------|--------------|--------------------------|--------------------------|
| BM<br>I | 1       | rs54560 | 17789 | SEC16 | 0.2   | 3.88E  | 1.97E-       | 0.9801,1.025             | -                        |
|         |         | 8       | 9121  | B     | 06    | -17    | 63           | 1,1.0835                 | 0.0202,0.0282,<br>0.0847 |
|         | 1       | rs66893 | 21962 | LYPLA | 0.4   | 2.86E  | 4.73E-       | 1.0249,0.990             | 0.0106,-                 |
|         |         | 35      | 8682  | L1    | 19    | -12    | 08           | 7,0.972                  | 0.0013,-<br>0.0167       |
|         | 2       | rs62104 | 46600 | FAM1  | 0.0   | 1.22E  | 3.57E-       | 1.0054,0.946             | 0.0083,-                 |
|         |         | 180     | 3     | 50B   | 5     | -11    | 51           | 1,0.8598                 | 0.075,-0.1488            |
|         | 2       | rs67519 | 63586 | TMEM  | 0.1   | 3.50E  | 3.31E-       | 1.0155,0.970             | 0.0197,-                 |
|         |         | 93      | 4     | 18    | 67    | -18    | 65           | 7,0.9188                 | 0.0361,-<br>0.0912       |
|         | 2       | rs10203 | 25136 | ADCY3 | 0.4   | 1.33E  | 8.45E-       | 0.9768,0.999             | -0.0272,3e-              |
|         |         | 386     | 866   |       | 52    | -11    | 43           | 4,1.0333                 | 04,0.0404                |
|         | 2       | rs16411 | 58965 | FANCL | 0.3   | 1.25E  | 4.42E-       | 0.9872,1.009             | -                        |
|         |         | 55      | 211   |       | 11    | -09    | 17           | 2,1.0266                 | 0.0141,0.0108,<br>0.0266 |
|         | 3       | rs12250 | 13164 | CPNE4 | 0.2   | 1.69E  | 2.85E-       | 0.9863,1.009,            | -                        |
|         |         | 53      | 2852  |       | 64    | -12    | 17           | 1.0577                   | 0.0109,0.0073,<br>0.0444 |
|         | 4       | rs10016 | 20213 | SLIT2 | 0.1   | 1.95E  | 2.11E-       | 0.9898,1.027             | -                        |
|         |         | 841     | 781   |       | 33    | -09    | 13           | 2,1.0621                 | 0.007,0.0187,0<br>.0468  |
| 4       | rs12507 | 45181   | GNPD  | 0.4   | 1.84E | 6.78E- | 0.9762,0.999 | -0.0243,-6e-             |                          |
|         | 026     | 334     | A2    | 34    | -11   | 41     | 8,1.0381     | 04,0.0435                |                          |
| 6       | rs34817 | 27176   | PRSS1 | 0.1   | 8.48E | 3.51E- | 0.9857,1.041 | -                        |                          |
|         | 112     | 628     | 6     | 34    | -17   | 08     | 6,1.0635     | 0.0054,0.0154,<br>0.026  |                          |
| 6       | rs31329 | 32176   | GPSM3 | 0.2   | 2.36E | 8.53E- | 0.9834,1.021 | -                        |                          |
|         | 47      | 782     |       | 18    | -13   | 15     | 4,1.0563     | 0.0096,0.0119,<br>0.038  |                          |
| 6       | rs98723 | 50803   | TFAP2 | 0.1   | 2.18E | 7.51E- | 0.9842,1.024 | -                        |                          |
|         | 7       | 050     | B     | 8     | -16   | 43     | 9,1.0845     | 0.0148,0.0247,<br>0.0833 |                          |
| 8       | rs17150 | 97457   | MSRA  | 0.1   | 1.38E | 2.05E- | 0.9925,1.024 | -                        |                          |
|         | 703     | 98      |       | 04    | -09   | 11     | 3,1.1486     | 0.0053,0.0196,           |                          |

|    |         |         |       |     |       |        |               |                |
|----|---------|---------|-------|-----|-------|--------|---------------|----------------|
|    |         |         |       |     |       |        |               | 0.0583         |
| 10 | rs41326 | 11476   | TCF7L | 0.3 | 3.88E | 2.75E- | 1.0205,0.986, | 0.0133,-       |
|    | 70      | 7771    | 2     | 12  | -11   | 15     | 0.9606        | 0.0084,-       |
|    |         |         |       |     |       |        |               | 0.0263         |
| 11 | rs20490 | 27694   | BDNF  | 0.1 | 6.91E | 8.20E- | 1.0115,0.979  | 0.0162,-       |
|    | 45      | 241     |       | 87  | -10   | 42     | 4,0.9461      | 0.0288,-       |
|    |         |         |       |     |       |        |               | 0.0563         |
| 12 | rs71329 | 50263   | BCDIN | 0.3 | 3.73E | 3.94E- | 0.9791,1.002  | -              |
|    | 08      | 148     | 3D    | 85  | -11   | 32     | 4,1.0429      | 0.0211,0.0046, |
|    |         |         |       |     |       |        |               | 0.0392         |
|    |         |         | ZNF66 |     |       |        |               |                |
| 12 | rs11057 | 12448   | 4-    | 0.3 | 1.05E | 6.30E- | 0.981,1.0071, | -              |
|    | 413     | 9162    | FAM1  | 34  | -10   | 09     | 1.0456        | 0.0104,0.0064, |
|    |         |         | 01A   |     |       |        |               | 0.0173         |
| 16 | rs40724 | 28937   | RABEP | 0.3 | 5.55E | 2.72E- | 0.9802,1.007  | -              |
|    | 02      | 259     | 2     | 37  | -12   | 28     | 6,1.0463      | 0.0185,0.0081, |
|    |         |         |       |     |       |        |               | 0.0393         |
| 16 | rs12716 | 31011   | STX1B | 0.3 | 1.40E | 7.30E- | 1.031,0.9897, | 0.0186,-       |
|    | 979     | 821     |       | 75  | -16   | 24     | 0.9517        | 0.0053,-       |
|    |         |         |       |     |       |        |               | 0.0328         |
| 16 | rs11642 | 53802   | FTO   | 0.4 | 1.73E | 7.43E- | 0.9398,1.001  | -              |
|    | 015     | 494     |       | 04  | -73   | 217    | 3,1.1095      | 0.0555,0.005,0 |
|    |         |         |       |     |       |        |               | .1062          |
| 18 | rs10871 | 57851   | MC4R  | 0.2 | 1.73E | 3.01E- | 0.9767,1.023  | -              |
|    | 777     | 763     |       | 36  | -19   | 81     | 2,1.0751      | 0.0248,0.0262, |
|    |         |         |       |     |       |        |               | 0.0897         |
| 19 | rs22386 | 46179   | GIPR  | 0.1 | 3.46E | 2.31E- | 1.0176,0.970  | 0.0142,-       |
|    | 91      | 043     |       | 94  | -15   | 32     | 6,0.9309      | 0.0231,-       |
|    |         |         |       |     |       |        |               | 0.0537         |
| W  |         |         |       |     |       |        |               | -              |
| C  | 1       | rs10913 | SEC16 | 0.2 | 3.80E | 4.50E- | 0.9848,1.018  | 0.0166,0.0229, |
|    |         | 469     | B     | 05  | -14   | 44     | 9,1.0695      | 0.0724         |
|    | 2       | rs62104 | FAM1  | 0.0 | 3.93E | 4.02E- | 1.0061,0.941  | 0.0077,-       |
|    |         | 180     | 50B   | 5   | -14   | 44     | 7,0.8124      | 0.0689,-       |
|    |         |         |       |     |       |        |               | 0.1472         |
|    | 2       | rs13412 | TMEM  | 0.1 | 9.76E | 1.39E- | 1.0134,0.972  | 0.0176,-       |

|    |                |               |              |           |              |               |                          |                                |
|----|----------------|---------------|--------------|-----------|--------------|---------------|--------------------------|--------------------------------|
|    | 194            | 5             | 18           | 72        | -15          | 55            | 6,0.9343                 | 0.0341,-<br>0.0761             |
| 3  | rs76499<br>70  | 12392<br>272  | PPARG        | 0.1<br>21 | 5.60E<br>-10 | 5.30E-<br>10  | 0.9915,1.024<br>5,1.0873 | -<br>0.0057,0.0186,<br>0.0314  |
| 4  | rs12507<br>026 | 45181<br>334  | GNPD<br>A2   | 0.4<br>34 | 2.39E<br>-11 | 9.40E-<br>31  | 0.9757,1.001<br>6,1.0355 | -0.0207,-8e-<br>04,0.0377      |
| 6  | rs13198<br>716 | 26582<br>035  | ABT1         | 0.1<br>09 | 4.89E<br>-15 | 0.0305        | 0.99,1.0363,1<br>.0714   | -<br>0.002,0.0078,0<br>.0046   |
| 6  | rs10620<br>70  | 32148<br>031  | RNF5         | 0.1<br>99 | 7.20E<br>-12 | 6.06E-<br>10  | 0.9862,1.022<br>1,1.043  | -<br>0.0079,0.0132,<br>0.0217  |
| 6  | rs44723<br>37  | 34769<br>765  | UHRF1<br>BP1 | 0.1<br>55 | 5.60E<br>-11 | 1.78E-<br>23  | 0.9893,1.023<br>7,1.0573 | -<br>0.0105,0.024,0<br>.0493   |
| 6  | rs98723<br>7   | 50803<br>050  | TFAP2<br>B   | 0.1<br>8  | 5.43E<br>-12 | 1.09E-<br>34  | 0.9874,1.019<br>9,1.0669 | -<br>0.0137,0.0239,<br>0.0663  |
| 7  | rs12667<br>251 | 13044<br>9458 | KLF14        | 0.4<br>36 | 6.82E<br>-12 | 1.91E-<br>05  | 1.025,0.9962,<br>0.9637  | 0.0096,-<br>0.0023,-<br>0.0109 |
| 12 | rs71333<br>78  | 12440<br>9502 | CCDC9<br>2   | 0.3<br>18 | 6.25E<br>-10 | 0.506         | 0.9845,1.007<br>1,1.0384 | 0.001,1e-04,-<br>0.0034        |
| 16 | rs80568<br>90  | 28897<br>452  | ATP2A<br>1   | 0.3<br>55 | 5.57E<br>-15 | 8.85E-<br>40  | 0.9759,1.009,<br>1.0433  | -<br>0.0234,0.0094,<br>0.0433  |
| 16 | rs34898<br>535 | 31025<br>641  | STX1B        | 0.3<br>78 | 1.11E<br>-11 | 6.24E-<br>22  | 1.0246,0.991,<br>0.9616  | 0.0173,-<br>0.0047,-<br>0.0316 |
| 16 | rs14210<br>85  | 53800<br>954  | FTO          | 0.4<br>04 | 3.27E<br>-52 | 3.21E-<br>166 | 0.9501,1.004<br>8,1.0807 | -<br>0.0481,0.0038,<br>0.0936  |
| 18 | rs11152<br>213 | 57852<br>948  | MC4R         | 0.2<br>36 | 5.62E<br>-15 | 1.39E-<br>70  | 0.9828,1.015<br>3,1.0646 | -<br>0.0224,0.0224,<br>0.0898  |

|    |    |             |           |         |       |          |          |                                  |                        |
|----|----|-------------|-----------|---------|-------|----------|----------|----------------------------------|------------------------|
|    | 19 | rs1800437   | 46181392  | GIPR    | 0.194 | 2.05E-11 | 1.19E-24 | 1.0137,0.9791,0.93               | 0.0124,-0.0203,-0.0445 |
| HC | 1  | rs6685593   | 203516075 | OPTC    | 0.495 | 5.99E-11 | 2.47E-12 | 0.9682,1.0032,1.0238             | -0.016,-3e-04,0.0181   |
|    | 1  | rs2605098   | 219643649 | LYPLA1  | 0.338 | 1.11E-20 | 3.87E-38 | 0.9723,1.0085,1.0687             | -0.0209,0.0081,0.0483  |
|    | 2  | rs62104180  | 466003    | FAM150B | 0.05  | 1.58E-09 | 5.56E-45 | 1.0054,0.9447,0.9202             | 0.0078,-0.07,-0.1422   |
|    | 2  | rs6751993   | 635864    | TMEM18  | 0.167 | 3.84E-12 | 1.43E-58 | 1.0142,0.9714,0.932              | 0.0186,-0.0337,-0.0883 |
|    | 2  | rs10200566  | 25130462  | ADCY3   | 0.451 | 2.32E-10 | 2.29E-18 | 0.9811,0.9976,1.0342             | -0.0171,0,0.026        |
|    | 6  | rs34158769  | 26336572  | BTN3A2  | 0.104 | 5.06E-15 | 4.20E-13 | 0.9881,1.0436,1.0925             | -0.0061,0.0238,0.0417  |
|    | 6  | rs3132947   | 32176782  | GPSM3   | 0.218 | 5.34E-11 | 2.52E-24 | 0.9851,1.0191,1.049              | -0.0132,0.0176,0.0429  |
|    | 6  | rs72891717  | 50858235  | TFAP2B  | 0.169 | 6.03E-10 | 1.10E-36 | 0.9869,1.0226,1.0786             | -0.0134,0.0247,0.0784  |
|    | 6  | rs141783576 | 127439897 | RSPO3   | 0.067 | 1.57E-10 | 4.72E-32 | 1.0064,0.9482,0.994 <sup>b</sup> | 0.0079,-0.0512,-0.0833 |
|    | 7  | rs17789506  | 130445574 | KLF14   | 0.493 | 2.80E-11 | 1.87E-18 | 0.9676,1.0001,1.0321             | -0.0189,-0.0019,0.0234 |
|    | 12 | rs10846580  | 124415453 | CCDC92  | 0.337 | 7.64E-12 | 9.27E-17 | 0.9793,1.0122,1.0302             | -0.016,0.0106,0.0209   |
|    | 16 | rs8056890   | 28897452  | ATP2A1  | 0.355 | 1.27E-09 | 1.71E-41 | 0.9762,1.0105,1.0362             | -0.0239,0.0096,0.0444  |
|    | 16 | rs34898     | 31025     | STX1B   | 0.3   | 2.57E    | 1.58E-   | 1.0248,0.994                     | 0.0198,-               |

|         |    |                |               |             |           |              |               |                          |                                |
|---------|----|----------------|---------------|-------------|-----------|--------------|---------------|--------------------------|--------------------------------|
|         |    | 535            | 641           |             | 78        | -12          | 27            | 5,0.9502                 | 0.0054,-<br>0.0352             |
|         | 16 | rs14210<br>85  | 53800<br>954  | FTO         | 0.4<br>04 | 1.65E<br>-48 | 2.05E-<br>152 | 0.9486,1.002<br>9,1.0909 | -<br>0.0462,0.0039,<br>0.0893  |
|         | 18 | rs11152<br>213 | 57852<br>948  | MC4R        | 0.2<br>36 | 2.39E<br>-16 | 1.44E-<br>72  | 0.98,1.0189,1<br>.0704   | -<br>0.0237,0.0257,<br>0.0817  |
|         | 19 | rs22386<br>91  | 46179<br>043  | GIPR        | 0.1<br>94 | 4.52E<br>-11 | 9.80E-<br>20  | 1.0162,0.972<br>7,0.9364 | 0.0105,-<br>0.0164,-<br>0.0467 |
| W<br>HR | 5  | rs45919<br>3   | 55806<br>751  | C5orf6<br>7 | 0.2<br>53 | 2.86E<br>-13 | 1.75E-<br>19  | 0.9859,1.010<br>2,1.0584 | -<br>0.0128,0.0129,<br>0.0354  |
| BF<br>P | 1  | rs28204<br>68  | 21967<br>3705 | LYPLA<br>L1 | 0.3<br>45 | 3.76E<br>-11 | 3.46E-<br>21  | 0.9824,1.006<br>3,1.0364 | -<br>0.0164,0.0066,<br>0.0328  |
|         | 2  | rs11282<br>49  | 16552<br>8624 | GRB14       | 0.3<br>92 | 1.93E<br>-09 | 2.32E-<br>18  | 0.9819,1.004<br>5,1.0279 | -<br>0.0165,0.0039,<br>0.0275  |
|         | 3  | rs90039<br>9   | 15679<br>8732 | CCNL1       | 0.3<br>97 | 1.82E<br>-09 | 0.0001<br>21  | 1.0198,0.993<br>2,0.9746 | 0.0065,-4e-<br>04,-0.0138      |
|         | 6  | rs25236<br>25  | 31315<br>648  | HLA-B       | 0.3<br>31 | 2.69E<br>-10 | 0.0215        | 0.9852,1.007<br>1,1.0331 | -<br>0.0049,0.0039,<br>0.0041  |
|         | 16 | rs62033<br>406 | 53824<br>226  | FTO         | 0.4<br>11 | 2.15E<br>-11 | 1.44E-<br>91  | 0.9806,0.999<br>1,1.0359 | -<br>0.0367,0.0025,<br>0.0677  |
| BM<br>R | 6  | rs10456<br>362 | 28221<br>816  | ZKSCA<br>N4 | 0.1<br>61 | 1.48E<br>-09 | 1.63E-<br>09  | 0.99,1.0252,1<br>.0064   | -<br>0.0069,0.0163,<br>0.0186  |
|         | 11 | rs80083<br>564 | 27733<br>143  | BDNF        | 0.1<br>36 | 1.15E<br>-09 | 2.32E-<br>22  | 0.9895,1.027<br>3,1.0718 | -<br>0.0092,0.0242,<br>0.0657  |
|         | 12 | rs78719<br>460 | 13339<br>5038 | GOLGA<br>3  | 0.3<br>1  | 1.66E<br>-09 | 1.92E-<br>12  | 0.984,1.0063,<br>1.0467  | -<br>0.0108,0.0054,            |

|    |         |       |      |     |       |        |              |                |
|----|---------|-------|------|-----|-------|--------|--------------|----------------|
|    |         |       |      |     |       |        |              | 0.0289         |
| 16 | rs14210 | 53800 | FTO  | 0.4 | 8.95E | 9.23E- | 0.9561,1.000 | -              |
|    | 85      | 954   |      | 04  | -47   | 154    | 8,1.0805     | 0.0469,0.0041, |
|    |         |       |      |     |       |        |              | 0.09           |
| 18 | rs47682 | 57852 | MC4R | 0.2 | 1.87E | 1.35E- | 0.9775,1.019 | -              |
|    | 8       | 587   |      | 37  | -20   | 148    | 5,1.0716     | 0.0351,0.0388, |
|    |         |       |      |     |       |        |              | 0.1125         |

Note: a) p values smaller than  $2.0 \times 10^{-9}$  are highlighted in pink; b) vQTLs with non-additive genetic effect on variance are highlighted in yellow.

(b) Testing for the variance effects of the BMI, WHR and FFR vQTLs on  $1/HT^2$ ,  $1/HC$  and  $1/FVC$  respectively.

| vQTL test      | SNP        | vQTL p-value |
|----------------|------------|--------------|
| BMI - $1/HT^2$ | rs545608   | 4.42E-01     |
|                | rs6689335  | 2.00E-01     |
|                | rs62104180 | 4.31E-02     |
|                | rs6751993  | 2.97E-01     |
|                | rs10203386 | 6.71E-03     |
|                | rs1641155  | 6.74E-01     |
|                | rs1225053  | 1.90E-01     |
|                | rs10016841 | 3.98E-01     |
|                | rs12507026 | 9.08E-01     |
|                | rs34817112 | 2.08E-01     |
|                | rs3132947  | 3.90E-01     |
|                | rs987237   | 7.39E-01     |
|                | rs17150703 | 1.24E-01     |
|                | rs4132670  | 7.29E-01     |
|                | rs2049045  | 6.00E-01     |
|                | rs7132908  | 9.29E-01     |
|                | rs11057413 | 1.71E-01     |
|                | rs4072402  | 1.99E-01     |
|                | rs12716979 | 1.73E-01     |
|                | rs11642015 | 7.65E-01     |
|                | rs10871777 | 8.46E-01     |
|                | rs2238691  | 9.75E-01     |

|             |            |          |
|-------------|------------|----------|
| WHR - 1/HC  | rs459193   | 9.98E-01 |
| FFR - 1/FVC | rs6537292  | 5.82E-01 |
|             | rs12374521 | 5.89E-01 |
|             | rs56077333 | 5.11E-06 |

(c) GEI analyses with five environmental factors/covariates in the UKB.

| Trait | CHR | SNP      | BP     | Nearest Gene | P values of GEI analyses with |        |        |        |         |
|-------|-----|----------|--------|--------------|-------------------------------|--------|--------|--------|---------|
|       |     |          |        |              | Sex                           | Age    | PA     | SB     | Smoking |
| FFR   | 4   | rs653729 | 145469 | HHIP         | 3.13E-                        | 7.20E- | 5.91E- | 6.39E- | 8.14E-  |
|       |     | 2        | 968    |              | 02                            | 01     | 01     | 01     | 02      |
|       | 5   | rs123745 | 147836 | FBXO38       | 9.46E-                        | 1.43E- | 2.63E- | 4.79E- | 2.88E-  |
|       |     | 21       | 880    |              | 02                            | 01     | 01     | 02     | 04      |
|       | 15  | rs560773 | 788990 | CHRNA3       | 2.36E-                        | 2.52E- | 9.88E- | 3.02E- | 4.55E-  |
|       |     | 33       | 03     |              | 02                            | 02     | 01     | 04     | 25      |
| BMI   | 1   | rs141466 | 240586 | GREM2        | 7.60E-                        | 7.09E- | 1.45E- | 4.26E- | 4.55E-  |
|       |     | 0        | 695    |              | 01                            | 05     | 01     | 01     | 01      |
|       | 6   | rs937122 | 151885 | CCDC170      | 9.81E-                        | 7.05E- | 8.33E- | 7.69E- | 1.28E-  |
|       |     | 1        | 986    |              | 01                            | 01     | 01     | 01     | 01      |
|       | 6   | rs302033 | 152008 | ESR1         | 2.08E-                        | 4.76E- | 3.28E- | 9.46E- | 9.53E-  |
|       |     | 2        | 924    |              | 01                            | 01     | 01     | 01     | 01      |
|       | 7   | rs457633 | 381537 | STARD3NL     | 2.85E-                        | 9.08E- | 1.17E- | 4.58E- | 4.45E-  |
|       |     | 4        | 47     |              | 01                            | 02     | 01     | 01     | 01      |
|       | 7   | rs102548 | 120956 | WNT16        | 3.06E-                        | 1.16E- | 4.02E- | 7.83E- | 1.59E-  |
|       |     | 25       | 440    |              | 04                            | 07     | 01     | 01     | 03      |
|       | 11  | rs603140 | 868846 | TMEM135      | 1.07E-                        | 2.75E- | 5.74E- | 4.58E- | 7.51E-  |
|       |     |          | 15     |              | 03                            | 02     | 01     | 02     | 01      |
| BW    | 3   | rs133224 | 156795 | CCNL1        | 8.46E-                        | 1.44E- | 6.87E- | 3.69E- | 9.36E-  |
|       |     | 35       | 468    |              | 02                            | 01     | 01     | 01     | 01      |
| BMI   | 1   | rs545608 | 177899 | SEC16B       | 8.59E-                        | 1.24E- | 6.11E- | 1.27E- | 7.51E-  |
|       |     |          | 121    |              | 03                            | 04     | 03     | 02     | 01      |
|       | 1   | rs668933 | 219628 | LYPLAL1      | 6.65E-                        | 1.90E- | 3.15E- | 1.13E- | 7.38E-  |
|       |     |          | 682    |              | 01                            | 01     | 02     | 01     | 01      |
|       | 2   | rs621041 | 466003 | FAM150B      | 2.75E-                        | 5.36E- | 2.52E- | 2.07E- | 1.48E-  |
|       |     |          | 80     |              | 01                            | 02     | 04     | 01     | 01      |
|       | 2   | rs675199 | 635864 | TMEM18       | 7.08E-                        | 1.01E- | 1.49E- | 9.67E- | 2.06E-  |

|    |          |        |         |        |        |        |        |        |
|----|----------|--------|---------|--------|--------|--------|--------|--------|
|    | 3        |        |         | 01     | 07     | 02     | 01     | 01     |
| 2  | rs102033 | 251368 | ADCY3   | 2.52E- | 4.94E- | 8.81E- | 8.92E- | 4.51E- |
|    | 86       | 66     |         | 01     | 02     | 03     | 01     | 01     |
| 2  | rs164115 | 589652 | FANCL   | 8.94E- | 4.64E- | 9.82E- | 3.09E- | 3.73E- |
|    | 5        | 11     |         | 01     | 01     | 01     | 01     | 01     |
| 3  | rs122505 | 131642 | CPNE4   | 1.78E- | 7.44E- | 9.53E- | 8.74E- | 4.52E- |
|    | 3        | 852    |         | 01     | 01     | 01     | 01     | 01     |
| 4  | rs100168 | 202137 | SLIT2   | 4.41E- | 8.52E- | 8.64E- | 5.42E- | 3.88E- |
|    | 41       | 81     |         | 01     | 01     | 03     | 03     | 03     |
| 4  | rs125070 | 451813 | GNPDA2  | 1.59E- | 6.19E- | 6.40E- | 1.46E- | 5.21E- |
|    | 26       | 34     |         | 01     | 02     | 02     | 01     | 01     |
| 6  | rs348171 | 271766 | PRSS16  | 9.93E- | 1.91E- | 1.52E- | 9.24E- | 9.21E- |
|    | 12       | 28     |         | 01     | 02     | 01     | 03     | 01     |
| 6  | rs313294 | 321767 | GPSM3   | 2.18E- | 1.92E- | 6.16E- | 1.41E- | 3.66E- |
|    | 7        | 82     |         | 01     | 03     | 01     | 01     | 01     |
| 6  | rs987237 | 508030 | TFAP2B  | 1.24E- | 1.41E- | 4.31E- | 1.68E- | 2.49E- |
|    |          | 50     |         | 01     | 02     | 01     | 01     | 02     |
| 8  | rs171507 | 974579 | MSRA    | 2.62E- | 7.88E- | 3.15E- | 6.25E- | 9.09E- |
|    | 03       | 8      |         | 01     | 01     | 01     | 02     | 01     |
| 10 | rs413267 | 114767 | TCF7L2  | 3.03E- | 5.72E- | 1.73E- | 6.84E- | 2.36E- |
|    | 0        | 771    |         | 01     | 01     | 03     | 04     | 01     |
| 11 | rs204904 | 276942 | BDNF    | 1.67E- | 2.66E- | 1.59E- | 9.22E- | 2.62E- |
|    | 5        | 41     |         | 01     | 01     | 02     | 01     | 01     |
| 12 | rs713290 | 502631 | BCDIN3D | 2.73E- | 2.94E- | 1.36E- | 2.15E- | 5.88E- |
|    | 8        | 48     |         | 01     | 01     | 03     | 07     | 04     |
| 12 | rs110574 | 124489 | ZNF664- | 1.02E- | 2.03E- | 6.54E- | 5.81E- | 9.57E- |
|    | 13       | 162    | FAM101A | 01     | 01     | 02     | 03     | 01     |
| 16 | rs407240 | 289372 | RABEP2  | 9.25E- | 1.30E- | 1.82E- | 2.72E- | 3.58E- |
|    | 2        | 59     |         | 01     | 01     | 02     | 03     | 01     |
| 16 | rs127169 | 310118 | STX1B   | 6.74E- | 9.39E- | 7.48E- | 2.07E- | 5.89E- |
|    | 79       | 21     |         | 03     | 01     | 03     | 01     | 01     |
| 16 | rs116420 | 538024 | FTO     | 5.01E- | 2.35E- | 1.28E- | 1.64E- | 9.24E- |
|    | 15       | 94     |         | 03     | 04     | 10     | 09     | 05     |
| 18 | rs108717 | 578517 | MC4R    | 4.63E- | 3.72E- | 3.52E- | 1.41E- | 3.22E- |
|    | 77       | 63     |         | 01     | 03     | 04     | 02     | 02     |
| 19 | rs223869 | 461790 | GIPR    | 4.83E- | 7.04E- | 5.95E- | 1.74E- | 6.53E- |

|    |    | 1        | 43     |          | 01     | 01     | 02     | 04     | 01     |
|----|----|----------|--------|----------|--------|--------|--------|--------|--------|
| WC | 1  | rs109134 | 177913 | SEC16B   | 1.63E- | 4.96E- | 2.74E- | 1.31E- | 2.15E- |
|    |    | 69       | 519    |          | 01     | 03     | 02     | 01     | 01     |
|    | 2  | rs621041 | 466003 | FAM150B  | 6.08E- | 1.46E- | 1.04E- | 4.77E- | 5.19E- |
|    |    | 80       |        |          | 02     | 01     | 04     | 01     | 01     |
|    | 2  | rs134121 | 653245 | TMEM18   | 4.87E- | 1.88E- | 3.70E- | 7.16E- | 3.15E- |
|    |    | 94       |        |          | 01     | 07     | 02     | 01     | 01     |
|    | 3  | rs764997 | 123922 | PPARG    | 6.35E- | 1.49E- | 8.87E- | 7.91E- | 9.55E- |
|    |    | 0        | 72     |          | 01     | 01     | 02     | 01     | 01     |
|    | 4  | rs125070 | 451813 | GNPDA2   | 2.12E- | 2.10E- | 4.08E- | 6.70E- | 8.13E- |
|    |    | 26       | 34     |          | 01     | 02     | 01     | 02     | 01     |
|    | 6  | rs131987 | 265820 | ABT1     | 1.52E- | 1.50E- | 3.11E- | 2.45E- | 5.51E- |
|    |    | 16       | 35     |          | 01     | 04     | 02     | 03     | 01     |
|    | 6  | rs106207 | 321480 | RNF5     | 2.30E- | 3.46E- | 2.32E- | 3.13E- | 1.96E- |
|    |    | 0        | 31     |          | 01     | 05     | 01     | 01     | 01     |
|    | 6  | rs447233 | 347697 | UHRF1BP1 | 2.03E- | 6.15E- | 3.14E- | 5.56E- | 4.73E- |
|    |    | 7        | 65     |          | 01     | 01     | 02     | 03     | 01     |
|    | 6  | rs987237 | 508030 | TFAP2B   | 2.52E- | 9.32E- | 5.61E- | 2.19E- | 3.32E- |
|    |    |          | 50     |          | 02     | 03     | 01     | 01     | 02     |
|    | 7  | rs126672 | 130449 | KLF14    | 2.61E- | 6.30E- | 6.99E- | 3.50E- | 8.05E- |
|    |    | 51       | 458    |          | 01     | 01     | 01     | 01     | 01     |
|    | 12 | rs713337 | 124409 | CCDC92   | 3.59E- | 1.45E- | 7.05E- | 3.62E- | 6.79E- |
|    |    | 8        | 502    |          | 03     | 01     | 01     | 03     | 01     |
|    | 16 | rs805689 | 288974 | ATP2A1   | 8.75E- | 1.52E- | 3.93E- | 4.24E- | 2.10E- |
|    |    | 0        | 52     |          | 01     | 01     | 02     | 03     | 01     |
|    | 16 | rs348985 | 310256 | STX1B    | 5.92E- | 7.08E- | 1.69E- | 2.92E- | 9.87E- |
|    |    | 35       | 41     |          | 03     | 01     | 02     | 01     | 01     |
|    | 16 | rs142108 | 538009 | FTO      | 3.04E- | 2.17E- | 1.44E- | 2.84E- | 1.10E- |
|    |    | 5        | 54     |          | 02     | 04     | 07     | 08     | 02     |
|    | 18 | rs111522 | 578529 | MC4R     | 2.80E- | 1.36E- | 2.21E- | 3.39E- | 2.14E- |
|    |    | 13       | 48     |          | 02     | 02     | 03     | 02     | 01     |
|    | 19 | rs180043 | 461813 | GIPR     | 1.84E- | 4.59E- | 1.62E- | 9.50E- | 1.81E- |
|    |    | 7        | 92     |          | 01     | 01     | 01     | 04     | 01     |
| HC | 1  | rs668559 | 203516 | OPTC     | 6.22E- | 8.84E- | 3.48E- | 7.42E- | 3.80E- |
|    |    | 3        | 075    |          | 01     | 01     | 01     | 02     | 01     |
|    | 1  | rs260509 | 219643 | LYPLAL1  | 8.00E- | 8.14E- | 5.37E- | 4.52E- | 9.48E- |

|    |    |          |        |         |        |        |        |        |        |
|----|----|----------|--------|---------|--------|--------|--------|--------|--------|
|    |    | 8        | 649    |         | 03     | 01     | 02     | 01     | 01     |
|    | 2  | rs621041 | 466003 | FAM150B | 3.95E- | 2.89E- | 2.27E- | 4.70E- | 1.62E- |
|    |    | 80       |        |         | 01     | 01     | 05     | 02     | 01     |
|    | 2  | rs675199 | 635864 | TMEM18  | 6.50E- | 2.35E- | 1.87E- | 5.09E- | 3.11E- |
|    |    | 3        |        |         | 01     | 04     | 02     | 01     | 01     |
|    | 2  | rs102005 | 251304 | ADCY3   | 2.35E- | 1.73E- | 3.57E- | 7.90E- | 7.74E- |
|    |    | 66       | 62     |         | 01     | 01     | 02     | 01     | 01     |
|    | 6  | rs341587 | 263365 | BTN3A2  | 4.31E- | 1.05E- | 1.14E- | 1.60E- | 9.93E- |
|    |    | 69       | 72     |         | 01     | 02     | 02     | 02     | 01     |
|    | 6  | rs313294 | 321767 | GPSM3   | 9.79E- | 4.23E- | 2.53E- | 3.71E- | 7.46E- |
|    |    | 7        | 82     |         | 01     | 03     | 01     | 01     | 02     |
|    | 6  | rs728917 | 508582 | TFAP2B  | 2.32E- | 2.19E- | 5.21E- | 8.67E- | 1.67E- |
|    |    | 17       | 35     |         | 01     | 02     | 01     | 01     | 01     |
|    | 6  | rs141783 | 127439 | RSPO3   | 5.75E- | 5.59E- | 5.95E- | 8.08E- | 6.84E- |
|    |    | 576      | 897    |         | 01     | 01     | 02     | 02     | 01     |
|    | 7  | rs177895 | 130445 | KLF14   | 6.09E- | 4.28E- | 5.89E- | 1.36E- | 2.73E- |
|    |    | 06       | 574    |         | 05     | 01     | 02     | 01     | 01     |
|    | 12 | rs108465 | 124415 | CCDC92  | 6.97E- | 1.10E- | 4.89E- | 1.93E- | 6.48E- |
|    |    | 80       | 453    |         | 02     | 01     | 01     | 02     | 01     |
|    | 16 | rs805689 | 288974 | ATP2A1  | 7.53E- | 2.66E- | 1.68E- | 2.05E- | 5.89E- |
|    |    | 0        | 52     |         | 01     | 01     | 02     | 02     | 01     |
|    | 16 | rs348985 | 310256 | STX1B   | 1.60E- | 4.20E- | 1.62E- | 1.94E- | 2.77E- |
|    |    | 35       | 41     |         | 02     | 01     | 02     | 01     | 01     |
|    | 16 | rs142108 | 538009 | FTO     | 1.18E- | 2.05E- | 5.32E- | 2.17E- | 1.94E- |
|    |    | 5        | 54     |         | 01     | 03     | 07     | 06     | 04     |
|    | 18 | rs111522 | 578529 | MC4R    | 2.38E- | 2.19E- | 9.80E- | 1.41E- | 6.68E- |
|    |    | 13       | 48     |         | 01     | 02     | 04     | 02     | 03     |
|    | 19 | rs223869 | 461790 | GIPR    | 8.71E- | 9.12E- | 2.66E- | 2.64E- | 2.85E- |
|    |    | 1        | 43     |         | 02     | 01     | 01     | 04     | 01     |
| WH | 5  | rs459193 | 558067 | C5orf67 | 9.25E- | 4.82E- | 1.92E- | 3.48E- | 6.67E- |
| R  |    |          | 51     |         | 02     | 01     | 01     | 04     | 01     |
| BF | 1  | rs282046 | 219673 | LYPLAL1 | 8.76E- | 1.19E- | 1.60E- | 8.66E- | 2.40E- |
| P  |    | 8        | 705    |         | 01     | 01     | 02     | 02     | 01     |
|    | 2  | rs112824 | 165528 | GRB14   | 3.18E- | 2.91E- | 3.55E- | 3.41E- | 5.58E- |
|    |    | 9        | 624    |         | 01     | 02     | 01     | 04     | 01     |
|    | 3  | rs900399 | 156798 | CCNL1   | 1.04E- | 2.63E- | 2.15E- | 1.13E- | 1.64E- |

|    |    |          |        |         |        |        |        |        |        |
|----|----|----------|--------|---------|--------|--------|--------|--------|--------|
|    |    |          | 732    |         | 05     | 01     | 01     | 02     | 02     |
|    | 6  | rs252362 | 313156 | HLA-B   | 2.66E- | 2.87E- | 1.35E- | 6.76E- | 6.38E- |
|    |    | 5        | 48     |         | 01     | 01     | 01     | 01     | 01     |
|    | 16 | rs620334 | 538242 | FTO     | 1.14E- | 2.47E- | 4.43E- | 3.52E- | 1.02E- |
|    |    | 06       | 26     |         | 02     | 04     | 03     | 02     | 01     |
| BM | 6  | rs104563 | 282218 | ZKSCAN4 | 8.90E- | 8.38E- | 6.68E- | 1.60E- | 9.13E- |
| R  |    | 62       | 16     |         | 01     | 03     | 01     | 01     | 01     |
|    | 11 | rs800835 | 277331 | BDNF    | 4.20E- | 1.69E- | 1.00E- | 5.22E- | 9.89E- |
|    |    | 64       | 43     |         | 01     | 02     | 01     | 01     | 01     |
|    | 12 | rs787194 | 133395 | GOLGA3  | 3.41E- | 8.69E- | 3.04E- | 9.40E- | 6.67E- |
|    |    | 60       | 038    |         | 01     | 01     | 01     | 01     | 01     |
|    | 16 | rs142108 | 538009 | FTO     | 2.07E- | 2.60E- | 1.52E- | 1.45E- | 1.54E- |
|    |    | 5        | 54     |         | 01     | 07     | 06     | 07     | 03     |
|    | 18 | rs476828 | 578525 | MC4R    | 1.20E- | 1.22E- | 9.98E- | 6.47E- | 1.62E- |
|    |    |          | 87     |         | 01     | 03     | 03     | 02     | 02     |

Note: p values smaller than  $1.33 \times 10^{-4}$  are highlighted in pink.

**Table S3. GEI examples.**(a) GEI effect between the *CHRNA5-A3-B4* locus and smoking on FFR

| Phenotype | Top vQTL<br>SNP | Effect size (Standard error)     |                                 | P values         |                 |          |
|-----------|-----------------|----------------------------------|---------------------------------|------------------|-----------------|----------|
|           |                 | never<br>smokers (n=<br>188,860) | ever<br>smokers (n=<br>160,488) | vQTL<br>analysis | QTL<br>analysis | GEI test |
| FFR       | rs56077333      | 0.0105<br>(0.0035)               | -0.0453<br>(0.0042)             | 1.09E-14         | 2.11E-06        | 4.55E-25 |

(b) GEI effect between the *WNT16-CPED1* locus and age on BMD

| Phenotype | Top vQTL<br>SNP | Effect size (Standard error)                         |                                                       |                                                       |                                                      | P values         |                 |              |
|-----------|-----------------|------------------------------------------------------|-------------------------------------------------------|-------------------------------------------------------|------------------------------------------------------|------------------|-----------------|--------------|
|           |                 | Age<br>group 1:<br>40-49<br>years<br>(n =<br>59,734) | Age<br>group 2:<br>50-59<br>years<br>(n =<br>108,736) | Age<br>group 3:<br>60-69<br>years<br>(n =<br>156,173) | Age<br>group 4:<br>70-74<br>years<br>(n =<br>23,250) | vQTL<br>analysis | QTL<br>analysis | GEI<br>test  |
| BMD       | rs10254825      | 0.1448<br>(0.0081)                                   | 0.1650<br>(0.0059)                                    | 0.1907<br>(0.0050)                                    | 0.1765<br>(0.0119)                                   | 2.01E-<br>45     | 0               | 1.16E-<br>07 |

(c) Associations of *FTO* locus with obesity-related traits stratified by physical activity (PA) levels

| Phenotype | Top vQTL<br>SNP | Effect size (Standard error)        |                                           |                                     | P values         |                 |              |
|-----------|-----------------|-------------------------------------|-------------------------------------------|-------------------------------------|------------------|-----------------|--------------|
|           |                 | Low PA<br>group<br>(n =<br>103,374) | Intermediate<br>PA group<br>(n = 145,889) | High PA<br>group<br>(n =<br>97,506) | vQTL<br>analysis | QTL<br>analysis | GEI<br>test  |
| BMI       | rs11642015      | 0.1018<br>(0.0049)                  | 0.0715<br>(0.0037)                        | 0.0609<br>(0.0041)                  | 1.73E-<br>73     | 7.43E-<br>217   | 1.28E-<br>10 |
| WC        | rs1421085       | 0.0858<br>(0.0048)                  | 0.0652<br>(0.0037)                        | 0.0524<br>(0.0042)                  | 3.27E-<br>52     | 3.21E-<br>166   | 1.44E-<br>07 |
| HC        | rs1421085       | 0.0825<br>(0.0049)                  | 0.0623<br>(0.0037)                        | 0.0505<br>(0.0042)                  | 1.65E-<br>48     | 2.05E-<br>152   | 5.32E-<br>07 |
| BMR       | rs1421085       | 0.0842<br>(0.0049)                  | 0.0608<br>(0.0037)                        | 0.0531<br>(0.0043)                  | 8.95E-<br>47     | 9.23E-<br>154   | 1.52E-<br>06 |

(d) Associations of *FTO* locus with obesity-related traits stratified by sedentary behaviour (SB) levels

| Phenotype | Top vQTL | Effect size (Standard error) | P values |
|-----------|----------|------------------------------|----------|
|-----------|----------|------------------------------|----------|

| SNP |            | SB group 1:<br>0-5 hours<br>( <i>n</i> =<br>244,215) | SB group 2:<br>6-11 hours<br>( <i>n</i> =<br>89,712) | SB group<br>3:<br>12-17<br>hours<br>( <i>n</i> = 5,445) | vQTL<br>analysis | QTL<br>analysis | GEI<br>test  |
|-----|------------|------------------------------------------------------|------------------------------------------------------|---------------------------------------------------------|------------------|-----------------|--------------|
| BMI | rs11642015 | 0.0694<br>(0.0027)                                   | 0.1001<br>(0.0052)                                   | 0.1085<br>(0.0234)                                      | 1.73E-<br>73     | 7.43E-<br>217   | 1.64E-<br>09 |
| WC  | rs1421085  | 0.0593<br>(0.0028)                                   | 0.0879<br>(0.0050)                                   | 0.1089<br>(0.0223)                                      | 3.27E-<br>52     | 3.21E-<br>166   | 2.84E-<br>08 |
| HC  | rs1421085  | 0.0577<br>(0.0028)                                   | 0.0815<br>(0.0052)                                   | 0.1199<br>(0.0230)                                      | 1.65E-<br>48     | 2.05E-<br>152   | 2.17E-<br>06 |
| BMR | rs1421085  | 0.0576<br>(0.0028)                                   | 0.0849<br>(0.0052)                                   | 0.1024<br>(0.0233)                                      | 8.95E-<br>47     | 9.23E-<br>154   | 1.45E-<br>07 |
